# Vaccination and the evolution of seasonal influenza

Frank T. Wen<sup>\*a</sup>, Anup Malani<sup>b,c</sup>, and Sarah Cobey<sup>a,d</sup>

<sup>a</sup>Department of Ecology and Evolution,

<sup>b</sup>The University of Chicago Law School,

<sup>c</sup>The University of Chicago Pritzker School of Medicine,

<sup>d</sup>Committee on Microbiology, University of Chicago, Chicago, Illinois, USA

July 18, 2018

## 1 Abstract

2 Although vaccines against seasonal influenza are designed to protect against currently circulating  
3 strains, they may also affect the emergence of antigenically divergent strains and thereby change  
4 the rate of antigenic evolution. Such evolutionary effects could change the benefits that vaccines  
5 confer to vaccinated individuals and to the host population (i.e., the private and social benefits of  
6 vaccination). To investigate the potential evolutionary impacts of vaccination, we simulated the  
7 dynamics of an influenza A/H3N2-like pathogen in a host population receiving annual vaccines.  
8 On average, increasing vaccination rates decreased the cumulative amount of antigenic evolution of  
9 the viral population and the incidence of disease. Vaccination at a 5% random annual vaccination  
10 rate, implying a 48% cumulative vaccine coverage after 20 years, decreased cumulative evolution  
11 by 56% and incidence by 76%. These effects were mediated by the breadth of immunity conferred  
12 by the vaccine. To understand how the evolutionary effects of vaccination might affect its private  
13 and social benefits over multiple seasons, we fit linear panel models to simulated longitudinal  
14 infection and vaccination histories. Including the evolutionary effects of vaccination lowered the  
15 private benefits by 14% but increased the social benefits by 30% (at a 5% annual vaccination rate)  
16 compared to when evolutionary effects were ignored. Thus, in the long term, vaccines' private  
17 benefits may be lower and social benefits may be higher than predicted by current measurements  
18 of vaccine impact, which do not capture long-term evolutionary effects. These results suggest that  
19 conventional seasonal vaccines against influenza, if protective against transmission, could greatly  
20 reduce the burden of disease by slowing antigenic evolution. Additionally, these evolutionary effects  
21 could compound collective action problems, increasing the importance of social policies to encourage  
22 vaccination.

## 23 1 Introduction

24 As seasonal influenza evolves from year to year, antigenic differences between previously and cur-  
25 rently circulating strains contribute to low vaccine efficacy [1–4] and high incidence of influenza

---

\*frankwen@uchicago.edu

26 illness [2, 5]. The influenza A/H3N2 subtype evolves faster than influenza A/H1N1 and B [6], and  
27 the vaccine is least effective against A/H3N2 on average compared to other circulating subtypes [7].  
28 While vaccines regularly undergo reformulation to accommodate antigenic evolution, it is also the-  
29 oretically possible for vaccines to affect antigenic evolution [8]. Traditional estimates of the public  
30 health benefits of influenza vaccines tend to focus on the benefits of vaccination in the current  
31 season and assume viral evolution is unchanged by the vaccine [9–12]. Accounting for the potential  
32 evolutionary impact of vaccines, however, may alter assessments of their long-term value.

33 In theory, seasonal influenza vaccines might be able to slow antigenic evolution [13–15]. Univer-  
34 sal vaccines, which confer immunity against all antigenic variants, are predicted to slow antigenic  
35 evolution by uniformly decreasing the fitness of all strains [15]. Conventional vaccines against sea-  
36 sonal influenza, which protect against some strains more than others and thereby confer narrower  
37 immunity, might have similar effects. First, by reducing the prevalence of infection, they reduce  
38 viral population size and thus the probability that antigenic escape mutants will arise. Second,  
39 although vaccination increases the growth rate of antigenically distant mutants relative to less dis-  
40 tant mutants (which can lead to strain replacement in other pathogens [16–26]), it also increases  
41 the amount of immunity in the population. This increased immunity reduces the growth rate or  
42 invasion fitness of escape mutants, slowing the rate of strain replacement (SI 1.1, Eq. S19, Fig. S1).  
43 Finally, smaller viral population sizes increase the rate at which different strains go stochastically  
44 extinct, weakening selection for more antigenically diverged strains. However, vaccination might  
45 *accelerate* antigenic evolution if the vaccine is ineffective against some strains that compete with  
46 vaccine-targeted strains, leading to strain replacement or vaccine escape [27, 28].

47 Vaccination’s potential evolutionary effects may change the private and social benefits of vacci-  
48 nation. Vaccination confers a private benefit to vaccinated individuals by directly reducing their risk  
49 of infection: the vaccine reduces the within-season rate of clinical laboratory-confirmed influenza  
50 infections in healthy adult recipients by 41% (95% CI 36-47%) [29]. Vaccination also confers a  
51 social benefit to the host population by reducing the burden of disease, although these effects  
52 are infrequently measured. Vaccinating children reduces the risk of influenza infection in unvac-  
53 cinated household contacts by 30-40% [30, 31], in the local community by up to 5-82% [32], and  
54 in a metropolitan county by up to 59% [33]. The valuation of private and social benefits changes  
55 according to how much vaccination decreases the burden of disease. If vaccines slow antigenic  
56 evolution and thereby further decrease incidence, then the social benefit increases. However, the  
57 private benefit may fall as the lower infection risk reduces vaccines’ marginal protective benefit. As  
58 the private benefit falls, additional incentives might be necessary to compensate for less frequent  
59 voluntary vaccination [34, 35]. A reduction in antigenic evolution from vaccination could also reduce  
60 the need to update vaccines as frequently.

61 Empirical estimates of the benefits of vaccination have so far been unable to measure the poten-  
62 tial long-term evolutionary effects of vaccination. Most studies estimating the value of vaccination  
63 occur in temperate populations such as North America, Europe, and Oceania, which have high vac-  
64 cine coverage but do not consistently contribute to influenza’s long-term evolution [7, 36–39]. By  
65 contrast, source populations that contribute more to influenza’s evolution (e.g., China and India)  
66 have almost zero vaccination [36–38], and few studies of vaccination occur there [40].

67 We consider here the consequences of an idealized vaccination strategy, where vaccination occurs  
68 in populations that shape influenza’s long-term evolution. To assess the potential effects of vaccines  
69 on antigenic evolution, we simulated the evolutionary and epidemiological dynamics of an influenza-  
70 like pathogen. We evaluated how different rates of vaccination may slow antigenic evolution and in  
71 turn decrease the total burden of disease. We then quantified how the evolutionary effects change  
72 the relative magnitude of the private and social benefits of vaccination in the short and long term.

## 73 2 Results

### 74 2.1 Modeling approach and choice of parameters

75 We adapted a model to simulate the transmission and evolution of an influenza-like pathogen over  
76 20 years in a well-mixed population (Methods) [41]. Individuals infected with a strain of the virus  
77 can transmit their infection to susceptible individuals upon contact. The risk of infection given  
78 contact depends on the antigenic identities (phenotypes) of previous infections and the challenging  
79 strain. After recovering from infection, individuals acquire immunity against the infecting strain,  
80 whose antigenic phenotype is represented by a point in two-dimensional Euclidean space (Fig. 1A).  
81 Geometrically distributed mutations displace strains in this space (Table S1, Fig. 1D). This space  
82 is analogous to the main components after multidimensional scaling of pairwise measurements  
83 of cross-reactivity in hemagglutination inhibition (HI) assays, where one antigenic unit of distance  
84 represents a twofold dilution of antiserum [6,42]. Each antigenic unit difference in distance between  
85 strains increases susceptibility by 7% (Fig. 1C) [1,41,43].

86 The model reproduces characteristic epidemiological and evolutionary patterns of the A/H3N2  
87 subtype in the absence of vaccination (Fig. 1A,B). Unvaccinated populations are best for model  
88 validation because they contribute most to the evolution of seasonal influenza in reality [36,38].  
89 We chose transmission and mutation parameters (Table S1) such that simulated epidemiological  
90 and evolutionary patterns most resembled qualitative patterns observed for H3N2 [44]. H3N2 has  
91 remained endemic in the human population since its emergence in 1968 and also has low standing  
92 genetic and antigenic diversity. Due to the stochastic nature of the simulations, the viral population  
93 goes extinct 18% of the time and becomes too diverse 29% of the time across replicate simulations.  
94 A viral population is considered too diverse when the time separating two co-circulating lineages  
95 (time to most recent common ancestor, or TMRCA) exceeds 10 years, since recent H3N2 HA  
96 lineages have coexisted for no more than 7 years. The remaining 53% of simulations that show  
97 qualitatively influenza-like dynamics reproduce epidemiological and evolutionary statistics of H3N2.  
98 The viral population has low genealogical diversity with an average TMRCA across replicates of 3.80  
99 years ( $SD = 0.52$ ), comparable to empirical estimates of 3.84 years [38]. The path of evolution in  
100 antigenic space is mostly constrained to one dimension (Fig. 1A), characteristic of H3N2's antigenic  
101 evolution [6,42]. Antigenic evolution occurs at an average rate of 1.09 antigenic units per year ( $SD$   
102  $= 0.14$ ), comparable to an observed rate of 1.01 antigenic units per year [6]. The mean annual  
103 incidence is 9.0% ( $SD = 1.0\%$ ). Annual incidence across all types of seasonal influenza ranges from  
104 9-15% [45]. To confirm the accuracy of the model's transmission dynamics, we compared model  
105 outputs against analytic expectations without evolution (since analytic solutions for a model with  
106 evolution are intractable) (Figs. S2, S3, S4, and S5).

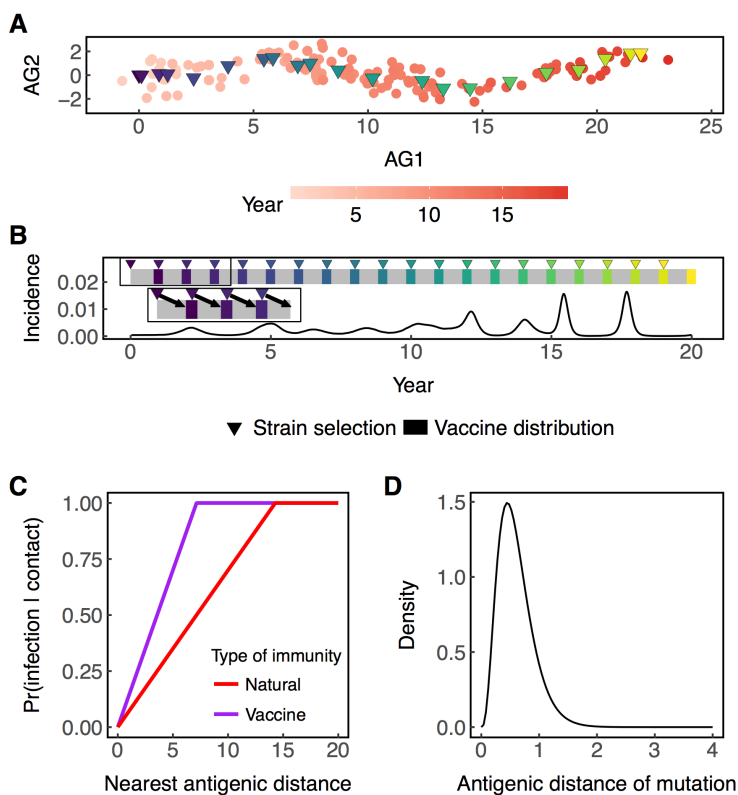

Figure 1: Properties of the model. (A) Antigenic phenotypes are represented as points in two-dimensional space (AG1 is antigenic dimension 1 and AG2 is antigenic dimension 2). Over time, new strains appear as old strains can no longer transmit to immune hosts. Viral evolution is mostly linear in antigenic space. The amount of evolution is calculated as the distance between the founding strain and the average phenotype of strains circulating at the end of the simulation. Vaccine strains (triangles) are chosen at the beginning of each year by averaging the antigenic phenotype of all circulating strains. Strains are colored according time. (B) Incidence per 10 days is shown. Cumulative incidence (not shown) is calculated as the sum of cases over the duration of the simulation. Vaccines are distributed beginning 300 days after strain selection for 120 days. Strain selection for the following year occurs during the distribution of the current vaccine (inset). (C) Upon contact, the risk of infection increases linearly with the distance between the infecting strain and the strain in the host’s infection or vaccination history that minimizes the risk of infection (Eq. 3) (D) The sizes of antigenic mutations are chosen from a gamma distribution with mean and standard deviation  $\delta_{\text{mean}}$  and  $\delta_{\text{sd}}$ . The radial directions (not pictured) of mutations are chosen from a random uniform distribution. In this example, vaccines confer half the breadth of immunity as natural immunity ( $b = 0.5$ ).

107 To assess the potential effects of vaccination on antigenic evolution and disease burden, we  
 108 introduced vaccination to the host population. At the beginning of each year, a vaccine strain  
 109 is selected with the average antigenic phenotype of circulating strains. In the United States, the  
 110 seasonal influenza vaccine is typically distributed from September through February. Distribution  
 111 usually peaks in October or November, 8-9 months after strain selection [46]. In the model, the  
 112 vaccine is distributed 300 days after strain selection and for a period of 120 days. During distribu-  
 113 tion, individuals are randomly vaccinated at a constant daily rate (Eq. 2). Since individuals are

114 randomly vaccinated each year, the fraction of vaccinated individuals over time. At a 5% annual  
115 vaccination rate, approximately 4.9% of individuals in the population are vaccinated every year  
116 (due to sampling with replacement in the model) and 48.4% of the population has been vaccinated  
117 at least once by the twentieth year (Fig. S6A). At this rate, vaccination effectively renders 26.0%  
118 of individuals immune when vaccination is in equilibrium with antigenic evolution (Fig. S6B). We  
119 also tested the effects of the breadth of cross-immunity conferred by vaccination. The vaccine’s  
120 breadth  $b$  is defined as the ratio of the vaccine-induced immunity to that of infection-induced (or  
121 “natural”) immunity (Fig. 1). Vaccines with  $b = 1$  have breadth identical to natural immunity,  
122 whereas vaccines with  $b < 1$  ( $b > 1$ ) have respectively smaller (larger) breadth compared to natural  
123 immunity.

124 We initially used two metrics to quantify the effects of vaccination on the evolution and epi-  
125 demiology of the virus. First, because antigenic phenotypes evolve roughly linearly in two di-  
126 mensions [6, 41, 42], we measured the cumulative amount of antigenic evolution by calculating the  
127 antigenic distance between the founding strain’s antigenic phenotype and the average antigenic  
128 phenotype of strains circulating at the end of the simulation (Fig. 1). Second, we measured the  
129 burden of disease by calculating the cumulative incidence, or the total number of cases over the  
130 duration of the simulation divided by the population size (Fig. 1). In calculating the amount of  
131 antigenic evolution and incidence, we included simulations where the viral population remained  
132 endemic or went extinct. However, we excluded simulations where the viral population became too  
133 diverse (TMRCA  $> 10$  years) because our measure of cumulative antigenic evolution is inadequate  
134 for branching viral populations.

135 Because vaccination may qualitatively alter evolutionary patterns of H3N2, we used an addi-  
136 tional metric to assess evolutionary effects, namely the probability that viral populations would  
137 become too diverse (TMRCA  $> 10$  years) under different vaccination regimes. Viral populations  
138 that are too diverse have the potential to cause high morbidity because hosts are unlikely to have  
139 immunity against many antigenic variants. Influenza subtypes H1N1 and B evolve antigenically  
140 slower than H3N2 but have greater genetic diversity at any time [6, 38, 47, 48] Thus, we also examine  
141 whether vaccination, by affecting antigenic evolution, could also impact diversification.

142 To estimate the contribution of evolution to vaccination’s epidemiological impact, we compared  
143 simulations in which vaccination could affect antigenic evolution to simulations where it could not.  
144 We generated the latter by first running simulations without vaccination and recording strain phe-  
145 notypes and relative abundances at every time step to use as a reference. Then, in each time step  
146 of the simulations with vaccination, we replaced all infections with randomly selected contempo-  
147 raneous strains from an unvaccinated reference simulation, matching the reference frequencies. In  
148 this way, temporal changes in strain frequencies were unaffected by vaccination.

## 149 2.2 Vaccination reduces the average amount of antigenic evolution and disease 150 burden

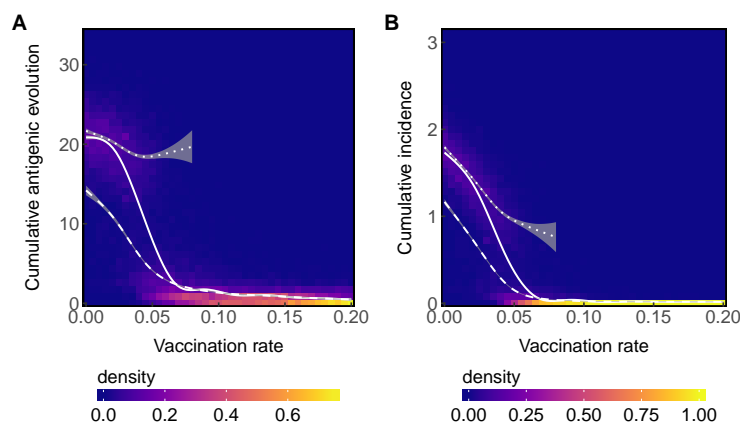

Figure 2: High vaccination rates decrease the average amount of (A) cumulative antigenic evolution and (B) cumulative incidence. The solid white lines show LOESS curves fit to cumulative antigenic evolution and incidence across all simulations. The dotted white lines show fits for simulations where the viral population survived until the end of the simulation. The dashed white lines show fits for simulations where the viral population went extinct. Shaded areas show 95% confidence intervals. Densities reflect 500 total simulations for each vaccination rate with excessively diverse simulations (TMRCA > 10 years) excluded, leaving ~ 300 – 400 simulations.

151 Vaccination reduces the average amount of antigenic evolution (Spearman’s  $\rho = -0.75$ ,  $p < 0.001$ )  
152 and incidence (Spearman’s  $\rho = -0.86$ ,  $p < 0.001$ , Fig. 2) when the breadth of vaccine-induced  
153 immunity is the same as that of infection. Without vaccination, the viral population evolves on  
154 average 21.5 (SD = 3.3) antigenic units and causes an average of 1.8 (SD = 0.2) cases per person  
155 over the 20-year simulation. By reducing susceptibility in the host population, vaccination decreases  
156 the number of cases and the average size of surviving mutations, thus slowing the rate of antigenic  
157 evolution. In turn, slower antigenic evolution further reduces the force of infection, often driving  
158 the virus extinct. Once extinct, the viral population can no longer evolve or cause new infections.  
159 Above a 10% annual vaccination rate, implying a 28% cumulative vaccination rate over 4 years,  
160 extinction occurs rapidly, typically within 2.3 years (SD = 0.6, Fig. S7). Eliminating the time  
161 interval between strain selection and vaccine distribution reduces the amount of antigenic evolution  
162 (Wilcoxon rank-sum test,  $p < 0.001$ ) and incidence (Wilcoxon rank-sum test,  $p < 0.001$ ) even more  
163 (Fig. S8).

164 Increasing the vaccination rate also decreases the probability that the viral population becomes  
165 too diverse (TMRCA > 10 years on average, Fig. S9). Thus, vaccination is unlikely to increase  
166 morbidity from diversifying viral populations.

167 We next examined how much these reductions could be attributed solely to the “ecological”  
168 effects of vaccination—the reduction in prevalence and increased extinction risk from enhanced herd  
169 immunity—versus the combined ecological and evolutionary impacts. Relative to the case where the  
170 evolutionary effects of vaccination are blocked, vaccination with evolutionary effects decreases both  
171 the rate of antigenic evolution and the burden of disease (Wilcoxon rank-sum test,  $p < 0.001$ ), (Fig.  
172 3). Also relative to the same baseline, eradication is achieved at a lower vaccination rate. At an 8.5%  
173 annual vaccination rate (~ 20% cumulative vaccine coverage within 5 years), vaccination eradicates

174 the virus 100% of the time (within 3.3 years on average) when vaccines can affect evolution but  
175 only does so 68% of the time (within 5.6 years on average) when vaccines cannot affect evolution.

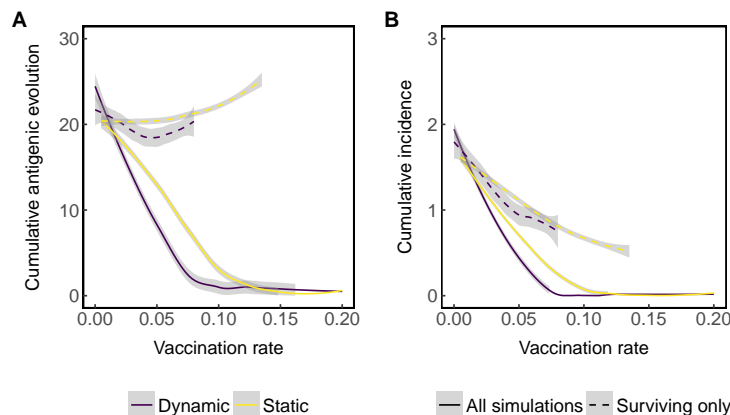

Figure 3: Vaccination further decreases incidence when vaccines can affect antigenic evolution compared to when they cannot. Purple lines represent simulations where vaccination can affect antigenic evolution. Yellow lines represent simulations where vaccination cannot affect antigenic evolution. The solid lines show LOESS fits to cumulative (A) antigenic evolution and (B) incidence across all simulations. The dotted lines show LOESS fits for simulations where the viral population does not go extinct. Shaded areas show 95% confidence intervals. Lines reflect 500 total simulations for each vaccination rate and evolutionary condition with excessively diverse simulations (TMRCA > 10 years) excluded, leaving ~ 300 – 400 simulations.

176 The breadth of vaccine-induced immunity and the delay between vaccine strain selection and  
177 distribution change the impact of vaccination. With narrower vaccines, higher vaccination rates  
178 are needed to achieve the same average reductions in cumulative antigenic evolution and incidence  
179 using broader vaccines (Fig. S10). Regardless of breadth, distributing vaccines immediately after  
180 strain selection helps vaccines achieve the same average reductions in evolution and incidence at  
181 lower vaccination rates (Fig. S12).

### 182 2.3 Vaccine-driven excessive evolution is rare

183 We developed a test to determine whether vaccination causes excess evolution. We defined excess  
184 evolution as more than 21 antigenic units (the average amount of evolution without vaccination)  
185 over the duration of the simulation, or when the TMRCA exceeded 10 years. We counted the  
186 number of “excessively evolved” simulations for each vaccination rate and breadth. If vaccination  
187 does not affect the rate of evolution, the frequency of excessively evolved simulations should be the  
188 same as in vaccine-free case (Fig. S14). In contrast, if vaccination increases the rate of evolution,  
189 the frequency of excessively evolved simulations should be greater than without vaccination.

190 Although viral populations that survive are associated with more evolution (Figs. 2, 3, S10), this  
191 apparent excess evolution is generally not caused by vaccination. Instead, these viral populations  
192 evolved just as much in the absence of vaccination, and only survive vaccination because they  
193 evolved unusually quickly. In these cases, more vaccination does not increase the rate of antigenic  
194 evolution, but instead drives slowly evolving viral populations extinct while occasionally allowing  
195 persistence of quickly evolving populations (Fig. S14). Thus, apparent increases in the amount  
196 of antigenic evolution among survivors generally reflect selection among simulations (not among

197 viruses within a simulation) for fast-evolving populations, and these populations would appear at  
198 the same rate without vaccination.

199 We found that vaccine-driven excess evolution was only possible at low-intermediate immune  
200 breadth ( $b = 0.2$  or  $0.3$ ) and at low vaccination rates (Fig. S13). Even when we detected statis-  
201 tically significant excess evolution, these outcomes were only 10% more common with vaccination  
202 relative to without. Based on this analysis, we conclude that vaccine-driven excessive evolution is  
203 rare for the influenza-like parameters considered.

## 204 2.4 Ignoring the evolutionary effects of vaccination overestimates the private 205 benefit and underestimates the social benefit of vaccination

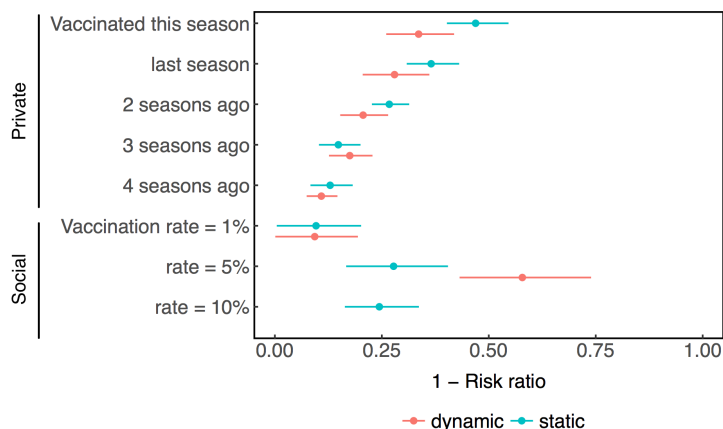

Figure 4: Comparison of the private and social benefits of vaccination when vaccination can or cannot affect antigenic evolution. Risk ratios are calculating using coefficients from a linear panel model fitted to the last 17 years of simulated hosts' infection and vaccination histories. Mean estimates and 95% confidence intervals are shown. Red lines represent simulations where vaccination can affect antigenic evolution (dynamic). Blue lines represent simulations where vaccination cannot affect antigenic evolution (static). The relative risk for a population with a 10% annual vaccination rate could not be calculated because all simulations were driven extinct within the first 3 years.

206 To quantify the private and social benefits of vaccination, we collected panel data consisting of  
207 individual hosts' vaccination and infection histories from simulations where vaccination could affect  
208 antigenic evolution and simulations where vaccination could not affect antigenic evolution. We then  
209 fit linear panel models to these data (Eq. 4). We measured the private benefit of vaccination as  
210 vaccine efficacy, or one minus the risk of infection having been vaccinated relative to the risk of  
211 infection having not been vaccinated (Eq. 5). To measure the social benefit, we used an analogous  
212 risk ratio. The social benefit is one minus the risk of infection in a population vaccinated at a  
213 given rate relative to the risk of infection in an unvaccinated population (Eq. 6). The social benefit  
214 reflects a reduction in the force of infection due to vaccination.

215 The social benefit of vaccination rises when vaccines can slow antigenic evolution compared to  
216 when evolutionary effects are omitted. The average risk of infection over the course of a season  
217 without vaccination is  $\sim 10\%$  (Table S3). When 5% of the host population is vaccinated annually,  
218 the average host is 60.5% less likely to become infected compared to a host in an unvaccinated  
219 population (Fig. 4, Table S3). However, when vaccination cannot affect antigenic evolution, the



220 average host is only 27.7% less likely to become infected (Fig. 4, Table S3) at the same vaccination  
221 rate relative to a host in an unvaccinated population. The social benefits accounting for evolution  
222 at 10% vaccination rate could not be calculated because the virus was always eradicated quickly.

223 Since the evolutionary effects of vaccination further reduce the overall risk of infection in the  
224 population, individuals personally benefit less from getting vaccinated when vaccines affect antigenic  
225 evolution than when vaccines do not. The reduction in the private benefit due to evolutionary effects  
226 is a natural consequence of lower incidence: when the overall risk of infection is low, the marginal  
227 benefit of vaccination is lower than when incidence is high (Eq. 5). Individuals receiving the current  
228 vaccine are 36.0% less likely to become infected in the same season compared to unvaccinated  
229 individuals when vaccines can affect evolution (Fig. 4, Table S3). However, when vaccines cannot  
230 affect antigenic evolution, vaccinated individuals are 49.5% less likely to become infected (Fig. 4,  
231 Table S3). We observed similar patterns when the breadth of vaccine-induced immunity was half  
232 that of natural immunity (Table S4).

233 By slowing antigenic evolution, vaccination prolongs its own effectiveness. When vaccination  
234 cannot affect antigenic evolution, the private benefit decreases by 9.0% per passing year compared to  
235 only 5.6% per passing year when vaccines can affect evolution (Fig. 4, Table S3). Thus, evolutionary  
236 effects cause the private benefits of vaccination to decay slower with time. Consequently, ignoring  
237 the evolutionary effects of vaccines also undervalues the long-term private benefits relative to the  
238 short-term private benefits.

### 239 3 Discussion

240 We found that vaccination against seasonal influenza could hypothetically slow antigenic evolution  
241 and thereby reduce the disease burden beyond its immediate impact on transmission. Indeed,  
242 annual vaccination rates as low as 10%, which imply a 28% cumulative vaccine coverage after 4  
243 years, can reliably eradicate the virus in simulation. This is a previously unrecognized potential  
244 benefit of widespread vaccination. At a 5% annual vaccination rate (16% cumulative coverage after  
245 4 years), evolution increases the social benefits of vaccination by 30.4%, which in turn decreases  
246 the private benefits by 13.5% compared to when evolutionary effects are omitted. Thus, while the  
247 evolutionary effects of vaccination yield a large social benefit by reducing incidence, they reduce  
248 the private benefit to vaccinated individuals.

249 Though our simulations suggest that a 10% annual vaccination rate could eradicate influenza,  
250 this prediction may not appear realistic since up to 8% of the global population is vaccinated each  
251 year [36]. However, vaccination is almost exclusively concentrated in seasonal populations rather  
252 than in the populations that contribute most to influenza's evolution [36–38]. For instance, from  
253 the 2008-2009 season to the 2014-2015 season, seasonal vaccine coverage averaged 43.4% in the  
254 United States and 13.5% across European countries, but was <1% in China and India [36, 49].  
255 Moreover, the same people tend to get vaccinated repeatedly, which lessens the accumulation of  
256 vaccine-induced immunity in the population over time. In the United States, up to 68.4% of  
257 vaccine recipients get vaccinated every year [50, 51]. Consecutive vaccinations may also reduce  
258 vaccine effectiveness by interacting with prior immune responses, although these effects are not  
259 well understood [52–55]. Thus, the effective amount of vaccine-induced immunity in a population  
260 is potentially lower than vaccine coverage estimates would suggest, implying higher vaccination  
261 rates might be necessary for eradication.

262 The seasonal influenza vaccine is unlikely to cause excessive evolution, assuming that the breadth  
263 of vaccine-induced immunity is similar to that of natural immunity. In simulations, vaccine-driven  
264 accelerated antigenic evolution only occurs when the breadth of vaccine-induced immunity is nar-

265 rower than that of natural infection and then only at low vaccination rates. The relative breadths  
266 of vaccine-induced and and natural immunity are unclear. One difference is that although natural  
267 infection elicits antibodies that bind both the hemagglutinin and the neuraminidase (NA) anti-  
268 gens, inactivated vaccines may induce fewer antibodies to NA [56], suggesting that the breadth of  
269 vaccine-induced immunity could be narrower than that of natural immunity. Host immune his-  
270 tory also affects the generation of immune responses [57–61], and by extension the breadths of  
271 vaccine-induced and natural immunity, in ways that are largely unexplored.

272 Although our simulations show vaccines typically slow evolution (and drive extinction) in a  
273 single, closed population (i.e., a global population), other models predict faster evolution or higher  
274 incidence under particular assumptions. Vaccination accelerates antigenic evolution when stochas-  
275 tic extinctions in small viral populations are ignored [27]. In contrast, stochastic extinctions in  
276 our agent based model weaken selection in small viral populations. Vaccines can also accelerate  
277 antigenic evolution locally when antigenically diverged strains can immigrate re-seed seasonal epi-  
278 demics [28]. Our model simulates a closed global population where immigration is not a source  
279 of novel strains and extinct viral populations cannot be re-seeded. Finally, assuming that new  
280 strains do not appear by mutation, vaccination targeting a single strain potentially increases inci-  
281 dence when two competing strains co-circulate [62]. In our model, strains emerge dynamically by  
282 mutation, so the novel strains are less likely to appear when prevalence is low.

283 Improved understanding of the fine-scale evolutionary and immunological dynamics might shift  
284 predictions. For instance, the rate of vaccine-driven evolution is sensitive to transmission rates and  
285 the distribution of mutation sizes. We chose transmission and mutation parameters such that the  
286 simulated epidemiological and evolutionary dynamics match those of H3N2 [41,44]. However, in  
287 this model, increasing the mutation rate, skewing the distribution of mutation sizes toward large  
288 mutations, or increasing the transmission rate increases the rate of antigenic evolution and the  
289 tendency for viral populations to diversify [41,44]. Such changes would also increase the probability  
290 that viral populations survive to evolve further or diversify especially under small amounts of  
291 vaccination (or vaccines with narrow breadth). Our model assumes that an individual’s immune  
292 responses against multiple infections or vaccinations are independent, but immunity from prior  
293 infection or vaccination affects subsequent immune responses [63]. Consistent with this hypothesis,  
294 there is evidence that vaccination history [52–54] and recipient age (potentially a proxy for infection  
295 history) [64] affect vaccine efficacy.

296 Our results suggest that conventional seasonal influenza vaccines, already have the potential to  
297 slow antigenic evolution and eradicate seasonal influenza. In theory, universal vaccines that im-  
298 munize against all strains necessarily slow antigenic evolution by not discriminating between anti-  
299 genic variants [15]. Increasing seasonal vaccine coverage, especially in populations that contribute  
300 substantially to influenza’s evolution, would help realize similar evolutionary benefits. However,  
301 as vaccination further reduces disease burden, people may require more incentives to get vacci-  
302 nated [34,35,65].

## 303 4 Methods

### 304 4.1 Model overview

305 We adapted an individual-based model of influenza’s epidemiological and evolutionary dynamics [41]  
306 to include vaccination. In each time step of a tau-leaping algorithm, individuals can be born, can die,  
307 can become infected after contacting other hosts, can recover from infection, or can be vaccinated.  
308 Transmission occurs by mass action, with the force of infection given by

$$\lambda(t) = \beta \frac{I(t)}{N}, \quad (1)$$

309 where  $I$  is the number of infected hosts. For computational efficiency, individuals cannot be coin-  
310 fected.

311 Antigenic phenotypes are represented as points in 2-dimensional Euclidean space, analogous to  
312 antigenic maps produced using pairwise measurements of serum cross-reactivity [6, 42]. One anti-  
313 genic unit corresponds to a two-fold antiserum dilution in a hemagglutination inhibition (HI) assay.  
314 At the beginning of the simulation, a single founding strain is introduced at the endemic equilib-  
315 rium in the host population. When hosts recover from infection, they acquire lifelong immunity to  
316 the infecting strain. Upon contact with an infected host, the probability that the susceptible host  
317 becomes infected is proportional to the distance  $d_n$  between the infecting strain and the nearest  
318 strain in the susceptible host's infection history, with one unit of antigenic distance conferring a  
319 7% absolute increase in risk (Eq. 3) [1, 41, 43].

320 Each infection mutates to a new antigenic phenotype at a rate  $\mu$  mutations per day. The  
321 mutation's radial direction is drawn from a uniform distribution, and the size (distance) is drawn  
322 from a gamma distribution with mean  $\delta_{\text{mean}}$  and standard deviation  $\delta_{\text{sd}}$ .

323 Vaccination occurs at rate  $r$ , breadth  $b$  (relative to natural immunity), and lag  $\theta$  (relative to the  
324 timing of strain selection). The vaccine strain is selected on the first day of each year. By default,  
325 the vaccine is distributed for 120 days. During the period of vaccine distribution, individuals are  
326 randomly vaccinated at a constant daily rate according to the specified annual vaccination rate.

$$r_{\text{day}} = r_{\text{annual}} \times \frac{1 \text{ year}}{365 \text{ days}} \quad (2)$$

327 By default, the breadth of vaccine-induced and natural immunity are equal. Thus, a host's  
328 probability of infection upon contact is given by

$$\text{Risk} = P(\text{infection}|\text{contact}) = \min\left\{1, cd_n, \frac{cd_v}{b}\right\} \quad (3)$$

329 where  $d_n$  is the distance between the infecting strain and the nearest strain in the host's infection  
330 history, and  $d_v$  is the distance between the infecting strain and the nearest strain in the host's  
331 vaccination history (if the host is vaccinated) and  $c = 0.07$  is a constant for converting antigenic  
332 distance to a risk of infection [1, 41, 43].

## 333 4.2 Simulation of vaccine-independent evolution

334 We created a simulation where vaccination could not affect antigenic evolution, the "static" sim-  
335 ulation. We first ran 500 simulations of the model without vaccination. For each simulation, we  
336 recorded the circulating strains and their relative abundances at each time step to use as reference  
337 viral populations. The evolution of these reference viral populations is unaffected by vaccination  
338 since they were obtained from simulations without vaccination.

339 To run the static simulation where vaccination could not affect antigenic evolution, we first  
340 randomly selected one of the reference viral populations. In each time step of the static simulation,  
341 the composition of the viral population was replaced with that of the reference viral population at  
342 the matched time step, scaled for prevalence. In this way, vaccination could still alter the overall  
343 viral abundance, but the rate of antigenic evolution was already previously set by the dynamics of  
344 the simulation without vaccination. Thus, vaccination was separated from the evolutionary process.

### 345 4.3 Estimating the private and social benefits of vaccination

346 To generate panel data, we ran simulations at four annual vaccination rates  $r$  (0%, 1%, 5%, and  
347 10%) and recorded individual hosts' dates of infection and vaccination. We randomly sampled  
348 0.005% of individuals from the host population at the end of the simulation for analysis. We fit  
349 a linear panel model (equation 4) to the simulated longitudinal vaccination data from multiple  
350 simulations  $j$ . Observations are at host  $i$  level in each time period  $\tau$  (see Table S2 for hypothetical  
351 example). The dependent variable indicator variable  $I_{ij\tau} = 1$  if a host is infected in the current  
352 season  $\tau$ , and 0 otherwise. The indicator  $V_{ij\tau} = 1$  if a host is vaccinated in the current season.  
353 Analogously lags  $V_{ij\tau-k}$  measure vaccination in period  $\tau - k$ . If the annual vaccination rate in  
354 the host population is, e.g., 5%, then  $r_{5ij} = 1$ . The regression is estimated as a linear probability  
355 model (with random effects) in order to simplify interpretation of reported coefficients. Standard  
356 errors are clustered at the simulation-level to account for correlation in outcomes across hosts in a  
357 simulation. The equation estimated is as follows.

$$I_{ij\tau} = \beta_0 + \beta_1 V_{ij\tau} + \beta_2 V_{ij\tau-1} + \dots + \beta_5 V_{ij\tau-4} + \beta_6 r_{1ij} + \beta_7 r_{5ij} + \beta_8 r_{10ij} + \epsilon_i + u_{j\tau} \quad (4)$$

358 The fitted coefficients estimate the change in probability of infection given an individual's  
359 vaccination status (direct effects) and the host population's vaccination rate (indirect effects). For  
360 example, the coefficient  $\beta_1$  estimates the absolute change in the probability of becoming infected  
361 in the current season for a host who has also been vaccinated in the current season. Likewise,  
362  $\beta_2, \beta_3, \beta_4$ , and  $\beta_5$  estimate the respective changes in the risk of becoming infected in the current  
363 season given vaccination one, two, three, and four seasons ago. Collectively,  $\beta_1, \dots, \beta_5$  represent  
364 the direct benefits of vaccination. More formally,  $\sum_{k=1}^5 \beta_k$  is the impulse response to vaccination  
365 over 5 years and measures the total direct protective benefit of vaccination over time.

366 The coefficients  $\beta_6, \beta_7$ , and  $\beta_8$  estimate the change in an individual's risk of infection in the  
367 current season when the population vaccination rate is 1%, 5%, or 10%, respectively. Thus,  $\beta_6, \beta_7$ ,  
368 and  $\beta_8$  represent the indirect benefits of vaccination under different vaccination policies.

369 To estimate the private benefit (equivalent to vaccine efficacy), the absolute reduction in risk  
370 can be expressed in terms of a relative risk.

$$\text{Private} = \left[ 1 - \frac{P(I = 1|V = 1)}{P(I = 1|V = 0)} \right] \times 100\% \quad (5)$$

371 To estimate the social benefit (or a social vaccine efficacy) for a specific vaccination rate  $R$ , we  
372 calculate an analogous relative risk:

$$\text{Social} = \left[ 1 - \frac{P(I = 1|r = R)}{P(I = 1|r = 0)} \right] \times 100\% \quad (6)$$

## 373 5 Data and code availability

374 The source code of the model can be found at <https://github.com/cobeylab/antigen-vaccine>.  
375 All data and code used to generate the results in this manuscript are available at <https://github.com/cobeylab/vaccine-manuscript>.  
376

## 377 **6 Competing interests**

378 We have no conflicts of interests to declare.

## 379 **7 Author contributions**

380 AM and SC conceived the study. FW performed the analysis and wrote the first draft of the paper.  
381 All of the authors contributed to and approved the final version.

## 382 **8 Acknowledgements**

383 This work was completed in part with resources provided by the University of Chicago Research  
384 Computing Center. FW and SC were supported by NIH grant DP2AI117921. FW was also sup-  
385 ported by NIH grant T32GM007281. We thank Ed Baskerville for programming guidance and  
386 Mercedes Pascual for insightful comments.

## 387 **References**

- 388 [1] Gupta, V., Earl, D. J. & Deem, M. W. Quantifying influenza vaccine efficacy and antigenic  
389 distance. *Vaccine* **24**, 3881–3888 (2006).
- 390 [2] Bridges, C. B. *et al.* Effectiveness and cost-benefit of influenza vaccination of healthy working  
391 adults: A randomized controlled trial. *JAMA* **284**, 1655–1663 (2000).
- 392 [3] Belongia, E. A. *et al.* Effectiveness of inactivated influenza vaccines varied substantially with  
393 antigenic match from the 2004–2005 season to the 2006–2007 season. *The Journal of Infectious*  
394 *Diseases* **199**, 159–167 (2009).
- 395 [4] Zimmerman, R. K. *et al.* 2014–2015 Influenza Vaccine Effectiveness in the United States by  
396 Vaccine Type. *Clinical Infectious Diseases* **63**, 1564–1573 (2016).
- 397 [5] Carrat, F. & Flahault, A. Influenza vaccine: The challenge of antigenic drift. *Vaccine* **25**,  
398 6852–6862 (2007).
- 399 [6] Bedford, T. *et al.* Integrating influenza antigenic dynamics with molecular evolution. *eLife* **3**,  
400 e01914 (2014).
- 401 [7] Belongia, E. A. *et al.* Variable influenza vaccine effectiveness by subtype: a systematic review  
402 and meta-analysis of test-negative design studies. *The Lancet. Infectious diseases* **16**, 942–951  
403 (2016).
- 404 [8] Kennedy, D. A. & Read, A. F. Why does drug resistance readily evolve but vaccine resistance  
405 does not? *Proceedings. Biological sciences* **284**, 20162562 (2017).
- 406 [9] Bansal, S., Pourbohloul, B. & Meyers, L. A. A comparative analysis of influenza vaccination  
407 programs. *PLoS Medicine* **3**, e387–10 (2006).
- 408 [10] Weycker, D. *et al.* Population-wide benefits of routine vaccination of children against influenza.  
409 *Vaccine* **23**, 1284–1293 (2005).

- 410 [11] Medlock, J. & Galvani, A. P. Optimizing influenza vaccine distribution. *Science* **325**, 1705–  
411 1708 (2009).
- 412 [12] Shim, E. & Galvani, A. P. Distinguishing vaccine efficacy and effectiveness. *Vaccine* **30**,  
413 6700–6705 (2012).
- 414 [13] Gog, J. R. & Grenfell, B. T. Dynamics and selection of many-strain pathogens. *Proceedings*  
415 *of the National Academy of Sciences* **99**, 17209–17214 (2002).
- 416 [14] Kucharski, A. & Gog, J. R. Influenza emergence in the face of evolutionary constraints.  
417 *Proceedings of the Royal Society B* **279**, 645–652 (2012).
- 418 [15] Arinaminpathy, N. *et al.* Impact of cross-protective vaccines on epidemiological and evolu-  
419 tionary dynamics of influenza. *Proceedings of the National Academy of Sciences of the United*  
420 *States of America* **109**, 3173–3177 (2012).
- 421 [16] Carman, W. F. *et al.* Vaccine-induced escape mutant of hepatitis B virus. *The Lancet* **336**,  
422 325–329 (1990).
- 423 [17] Lipsitch, M. Vaccination against colonizing bacteria with multiple serotypes. *Proceedings of*  
424 *the National Academy of Sciences* **94**, 6571–6576 (1997).
- 425 [18] Pai, R. *et al.* Postvaccine genetic structure of *Streptococcus pneumoniae* serotype 19A from  
426 children in the United States. *The Journal of Infectious Diseases* **192**, 1988–1995 (2005).
- 427 [19] Lee, C. W., Senne, D. A. & Suarez, D. L. Effect of Vaccine Use in the Evolution of Mexican  
428 Lineage H5N2 Avian Influenza Virus. *Journal of Virology* **78**, 8372–8381 (2004).
- 429 [20] Elomaa, A. *et al.* Strain Variation among *Bordetella pertussis* Isolates in Finland, Where the  
430 Whole-Cell Pertussis Vaccine Has Been Used for 50 Years. *Journal of Clinical Microbiology*  
431 **43**, 3681–3687 (2005).
- 432 [21] Martcheva, M., Bolker, B. M. & Holt, R. D. Vaccine-induced pathogen strain replacement:  
433 what are the mechanisms? *Journal of the Royal Society, Interface* **5**, 3–13 (2008).
- 434 [22] Adam, H. J. *et al.* Changing epidemiology of invasive *Haemophilus influenzae* in Ontario,  
435 Canada: Evidence for herd effects and strain replacement due to Hib vaccination. *Vaccine* **28**,  
436 4073–4078 (2010).
- 437 [23] Pilishvili, T. *et al.* Sustained Reductions in Invasive Pneumococcal Disease in the Era of  
438 Conjugate Vaccine. *The Journal of Infectious Diseases* **201**, 32–41 (2010).
- 439 [24] Feikin, D. R. *et al.* Serotype-Specific Changes in Invasive Pneumococcal Disease after Pneu-  
440 mococcal Conjugate Vaccine Introduction: A Pooled Analysis of Multiple Surveillance Sites.  
441 *PLoS Medicine* **10**, e1001517 (2013).
- 442 [25] Flück, C. *et al.* Effect of the malaria vaccine Combination B on merozoite surface antigen 2  
443 diversity. *Infection, Genetics and Evolution* **7**, 44–51 (2007).
- 444 [26] Genton, B. *et al.* A Recombinant BloodStage Malaria Vaccine Reduces *Plasmodium fal-*  
445 *ciparum* Density and Exerts Selective Pressure on Parasite Populations in a Phase 1–2b  
446 Trial in Papua New Guinea. *The Journal of Infectious Diseases* **185**, 820–827 (2002).

- 447 [27] Boni, M. F., Gog, J. R., Andreasen, V. & Feldman, M. W. Epidemic dynamics and antigenic  
448 evolution in a single season of influenza A. *Proceedings of the Royal Society B* **273**, 1307–1316  
449 (2006).
- 450 [28] Subramanian, R., Graham, A. L., Grenfell, B. T. & Arinaminpathy, N. Universal or Specific?  
451 A Modeling-Based Comparison of Broad-Spectrum Influenza Vaccines against Conventional,  
452 Strain-Matched Vaccines. *PLoS Computational Biology* **12**, e1005204–17 (2016).
- 453 [29] Demicheli, V., Jefferson, T., Ferroni, E., Rivetti, A. & Di Pietrantonj, C. Vaccines for pre-  
454 venting influenza in healthy adults. *Cochrane Database of Systematic Reviews* **2**, CD001269  
455 (2018).
- 456 [30] Hurwitz, E. S. *et al.* Effectiveness of influenza vaccination of day care children in reducing  
457 influenza-related morbidity among household contacts. *JAMA* **284**, 1677–1682 (2000).
- 458 [31] Principi, N., Esposito, S., Marchisio, P., Gasparini, R. & Crovari, P. Socioeconomic impact of  
459 influenza on healthy children and their families. *The Pediatric Infectious Disease Journal* **22**,  
460 S207–10 (2003).
- 461 [32] Loeb, M. *et al.* Effect of influenza vaccination of children on infection rates in Hutterite  
462 communities: a randomized trial. *JAMA* **303**, 943–950 (2010).
- 463 [33] Pebody, R. G., Green, H. K. & Andrews, N. Uptake and impact of vaccinating school age  
464 children against influenza during a season with circulation of drifted influenza A and B strains,  
465 England, 2014/15. *Euro surveillance* **20**, 1560–7917 (2015).
- 466 [34] Brewer, N. T. *et al.* Meta-analysis of the relationship between risk perception and health  
467 behavior: The example of vaccination. *Health Psychology* **26**, 136–145 (2007).
- 468 [35] Chapman, G. B. & Coups, E. J. Predictors of influenza vaccine acceptance among healthy  
469 adults. *Preventive medicine* **29**, 249–262 (1999).
- 470 [36] Palache, A., Oriol-Mathieu, V., Fino, M., Xydia-Charmanita, M. & Influenza Vaccine Supply  
471 task force (IFPMA IVS). Seasonal influenza vaccine dose distribution in 195 countries (2004-  
472 2013): Little progress in estimated global vaccination coverage. *Vaccine* **33**, 5598–5605 (2015).
- 473 [37] Bedford, T., Cobey, S., Beerli, P. & Pascual, M. Global migration dynamics underlie evolution  
474 and persistence of human influenza A (H3N2). *PLoS Pathogens* **6**, e1000918 (2010).
- 475 [38] Bedford, T. *et al.* Global circulation patterns of seasonal influenza viruses vary with antigenic  
476 drift. *Nature* **523**, 217–220 (2015).
- 477 [39] Osterholm, M. T., Kelley, N. S., Sommer, A. & Belongia, E. A. Efficacy and effectiveness of  
478 influenza vaccines: a systematic review and meta-analysis. *The Lancet. Infectious diseases* **12**,  
479 36–44 (2012).
- 480 [40] Tam, J. S. *et al.* Efficacy and safety of a live attenuated, cold-adapted influenza vaccine,  
481 trivalent against culture-confirmed influenza in young children in Asia. *The Pediatric Infectious  
482 Disease Journal* **26**, 619–628 (2007).
- 483 [41] Bedford, T., Rambaut, A. & Pascual, M. Canalization of the evolutionary trajectory of the  
484 human influenza virus. *BMC Biology* **10**, 38 (2012).

- 485 [42] Smith, D. J. *et al.* Mapping the antigenic and genetic evolution of influenza virus. *Science*  
486 **305**, 371–376 (2004).
- 487 [43] Park, A. W. *et al.* Quantifying the impact of immune escape on transmission dynamics of  
488 influenza. *Science* **326**, 726–728 (2009).
- 489 [44] Wen, F., Bedford, T. & Cobey, S. Explaining the geographical origins of seasonal influenza A  
490 (H3N2). *Proceedings of the Royal Society B* **283**, 20161312–9 (2016).
- 491 [45] World Health Organization. *Influenza Fact Sheet* (2014).
- 492 [46] Centers for Disease Control and Prevention. *FluVaxView* (2015).
- 493 [47] Chen, R. & Holmes, E. C. The evolutionary dynamics of human influenza B virus. *Journal of*  
494 *Molecular Evolution* **66**, 655–663 (2008).
- 495 [48] Cox, N. J. & Bender, C. A. The molecular epidemiology of influenza viruses. *Seminars in*  
496 *Virology* (1995).
- 497 [49] Palache, A., Oriol-Mathieu, V., Abelin, A. & Music, T. Seasonal influenza vaccine dose  
498 distribution in 157 countries (2004–2011). *Vaccine* **32**, 6369–6376 (2014).
- 499 [50] Flood, E. M. *et al.* Parents’ decision-making regarding vaccinating their children against  
500 influenza: A web-based survey. *Clinical therapeutics* **32**, 1448–1467 (2010).
- 501 [51] Uscher-Pines, L., Mulcahy, A., Maurer, J. & Harris, K. The relationship between influenza  
502 vaccination habits and location of vaccination. *PLoS ONE* **9**, e114863 (2014).
- 503 [52] Ohmit, S. E. *et al.* Influenza Vaccine Effectiveness in the 2011–2012 Season: Protection Against  
504 Each Circulating Virus and the Effect of Prior Vaccination on Estimates. *Clinical Infectious*  
505 *Diseases* **58**, 319–327 (2014).
- 506 [53] McLean, H. Q. *et al.* Impact of Repeated Vaccination on Vaccine Effectiveness Against In-  
507 fluenza A(H3N2) and B During 8 Seasons. *Clinical Infectious Diseases* **59**, 1375–1385 (2014).
- 508 [54] Skowronski, D. M. *et al.* Serial vaccination and the antigenic distance hypothesis: effects  
509 on influenza vaccine effectiveness during A(H3N2) epidemics in Canada, 2010–11 to 2014–15.  
510 *Journal of Infectious Diseases* (2017).
- 511 [55] Lewnard, J. & Cobey, S. Immune History and Influenza Vaccine Effectiveness. *Vaccines* **6**, 28  
512 (2018).
- 513 [56] Chen, Y.-Q. *et al.* Influenza Infection in Humans Induces Broadly Cross-Reactive and Protec-  
514 tive Neuraminidase-Reactive Antibodies. *Cell* **173**, 417–429.e10 (2018).
- 515 [57] Cobey, S. & Hensley, S. E. Immune history and influenza virus susceptibility. *Current opinion*  
516 *in virology* **22**, 105–111 (2017).
- 517 [58] Zost, S. J. *et al.* Contemporary H3N2 influenza viruses have a glycosylation site that alters  
518 binding of antibodies elicited by egg-adapted vaccine strains. *Proceedings of the National*  
519 *Academy of Sciences* (2017).
- 520 [59] Linderman, S. L. *et al.* Potential antigenic explanation for atypical H1N1 infections among  
521 middle-aged adults during the 2013–2014 influenza season. *Proceedings of the National Academy*  
522 *of Sciences of the United States of America* **111**, 15798–15803 (2014).



- 523 [60] Davenport, F. M. & Hennessy, A. V. A serologic recapitulation of past experiences with  
524 influenza A; antibody response to monovalent vaccine. *The Journal of experimental medicine*  
525 **104**, 85–97 (1956).
- 526 [61] Davenport, F. M. & Hennessy, A. V. Predetermination by infection and by vaccination of  
527 antibody response to influenza virus vaccines. *The Journal of experimental medicine* **106**,  
528 835–50 (1957).
- 529 [62] Zarnitsyna, V. I. *et al.* Intermediate levels of vaccination coverage may minimize seasonal  
530 influenza outbreaks. *PLOS ONE* **13**, e0199674 (2018).
- 531 [63] Smith, D. J., Forrest, S., Ackley, D. H. & Perelson, A. S. Variable efficacy of repeated an-  
532 nual influenza vaccination. *Proceedings of the National Academy of Sciences* **96**, 14001–14006  
533 (1999).
- 534 [64] McLean, H. Q. *et al.* Influenza vaccine effectiveness in the United States during 2012-2013:  
535 variable protection by age and virus type. *Journal of Infectious Diseases* **211**, 1529–1540  
536 (2015).
- 537 [65] Galvani, A. P., Reluga, T. C. & Chapman, G. B. Long-standing influenza vaccination policy  
538 is in accord with individual self-interest but not with the utilitarian optimum. *Proceedings of*  
539 *the National Academy of Sciences* **104**, 5692–5697 (2007).
- 540 [66] Jackson, C., Vynnycky, E. & Mangtani, P. Estimates of the transmissibility of the 1968 (Hong  
541 Kong) influenza pandemic: evidence of increased transmissibility between successive waves.  
542 *American Journal of Epidemiology* **171**, 465–478 (2010).
- 543 [67] Biggerstaff, M., Cauchemez, S., Reed, C., Gambhir, M. & Finelli, L. Estimates of the repro-  
544 duction number for seasonal, pandemic, and zoonotic influenza: a systematic review of the  
545 literature. *BMC Infectious Diseases* **14**, 1–20 (2014).
- 546 [68] Carrat, F. *et al.* Time lines of infection and disease in human influenza: a review of volunteer  
547 challenge studies. *American Journal of Epidemiology* **167**, 775–785 (2008).
- 548 [69] United Nations, Department of Economic and Social Affairs, Population Division, New York.  
549 *World Population Prospects: The 2012 Revision* (2013).

## 550 1 Supplementary Information

### 551 1.1 Vaccination and the invasion fitness of mutants

552 We use invasion analysis to understand how vaccination affects the invasion fitness of antigenically  
 553 diverged strains by effectively reducing susceptibility. We develop an expression for the fitness of  
 554 an invading mutant strain to explain how the antigenic selection gradient with vaccination.

555 Here,  $S$ ,  $I$ , and  $R$  represent the fraction of susceptible, infected, and recovered individuals.  
 556 The birth rate  $\nu$  and the death rate are equal, so the population size is constant. All individuals  
 557 are born into the susceptible class. Transmission occurs at rate  $\beta$ , and recovery occurs at rate  $\gamma$ .  
 558 We vaccinate some fraction  $p$  of newborns. In practice, this approximates vaccination of young  
 559 children, who are primarily responsible for influenza transmission. Vaccinated individuals move  
 560 into the recovered class.

$$\frac{dS}{dt} = \nu(1 - p) - \beta SI - \nu S \quad (\text{S1})$$

$$\frac{dI}{dt} = \beta SI - \gamma I - \nu I \quad (\text{S2})$$

$$\frac{dR}{dt} = \gamma I - \nu R + \nu p \quad (\text{S3})$$

561 The endemic equilibrium of  $S_{\text{eq}}$ ,  $I_{\text{eq}}$ , and  $R_{\text{eq}}$  is

$$S_{\text{eq}} = \frac{\gamma + \nu}{\beta} \equiv \frac{1}{R_0} \quad (\text{S4})$$

$$I_{\text{eq}} = \frac{\nu(R_0(1 - p) - 1)}{\beta} \quad (\text{S5})$$

$$R_{\text{eq}} = 1 - \frac{1}{R_0} - \frac{\nu(R_0(1 - p) - 1)}{\beta} \quad (\text{S6})$$

562 where  $R_0$ , the basic reproductive number, is the number of secondary infections from a single  
 563 infected individual in a totally susceptible population.

564 The disease-free equilibrium (when  $p > 1 - \frac{1}{R_0}$ ) is

$$S_{[I=0]} = 1 - p \quad (\text{S7})$$

$$I_{[I=0]} = 0 \quad (\text{S8})$$

$$R_{[I=0]} = p \quad (\text{S9})$$

565 We introduce a single invading mutant  $I' = \frac{1}{N}$ . To find the growth rate of the mutant, we  
 566 develop an expression for the amount of immunity against the mutant strain. The single mutant  
 567 has an antigenic phenotype  $d$  antigenic units away from the resident. The conversion factor between  
 568 antigenic units and infection risk is notated by  $c$ . Thus, the susceptibility to the mutant is given  
 569 by  $\min\{cd, 1\}$ , and immunity to the mutant is  $\max\{1 - cd, 0\}$ . For convenience, we assume  $cd \leq 1$ .

570 We can decompose  $R_{\text{eq}}$  into immunity conferred by recovery natural infection  $R_n$  and immunity  
 571 conferred by vaccination  $R_v$ :

$$R_n = 1 - \frac{1}{R_0} - \frac{\nu(R_0 - 1)}{\beta} \quad (\text{S10})$$

$$R_v = \frac{\nu R_0 p}{\beta} \quad (\text{S11})$$

$$R_{\text{eq}} = R_n + R_v \quad (\text{S12})$$

572 The fraction of the population immune to the invading strain from previous infection is denoted  
 573  $R'$ . Assuming that vaccines confer a breadth of immunity relative to natural immunity  $b$ ,

$$R' = (1 - cd)R_n + (1 - \frac{cd}{b})R_v \quad (\text{S13})$$

Note that when the mutant and resident are identical ( $d = 0$ ), the immunity to the invading strain is identical to the immunity against  $R' = R_{\text{eq}}$ . Allowing for coinfection, the fraction susceptible to the invading strain is

$$S' = 1 - R' - \frac{1}{N} \quad (\text{S14})$$

$$= 1 - R' \quad (\text{S15})$$

574 for large  $N$ . When the vaccination rate exceeds  $1 - \frac{1}{R_0}$ , the resident is eradicated and  $S'$  and  $R'$   
 575 are calculated using the disease-free equilibrium.

576 The invasion fitness  $s$  of the mutant relative to the endemic strain is the difference between the  
 577 per-capita growth rates. Note that since the resident is in equilibrium,  $dI/dt = 0$ .

$$s = \frac{1}{I'} \frac{dI'}{dt} - \frac{1}{I} \frac{dI}{dt} = [\beta S' - (\gamma + \nu)] - 0 \quad (\text{S16})$$

$$= \beta S' - (\gamma + \nu) \quad (\text{S17})$$

578 The value of  $s$  increases with greater distance between the mutant and resident, but decreases as  
 579 more hosts become vaccinated (Fig. S1A). The expected  $s$  can be used to determine the effect of  
 580 vaccine coverage on the expected invasion fitness of the mutant  $\frac{\partial \mathbf{E}(s)}{\partial p}$ .  $\mathbf{E}(s)$  is a function of the  
 581 expected distance of a mutant  $\mathbf{E}(d)$ . In our model, we assume gamma distributed mutation sizes  
 582 with a mean  $\delta_{\text{mean}}$  of 0.3 antigenic units and standard deviation  $\delta_{\text{sd}}$  of 0.6 antigenic units (Fig.  
 583 S1C).

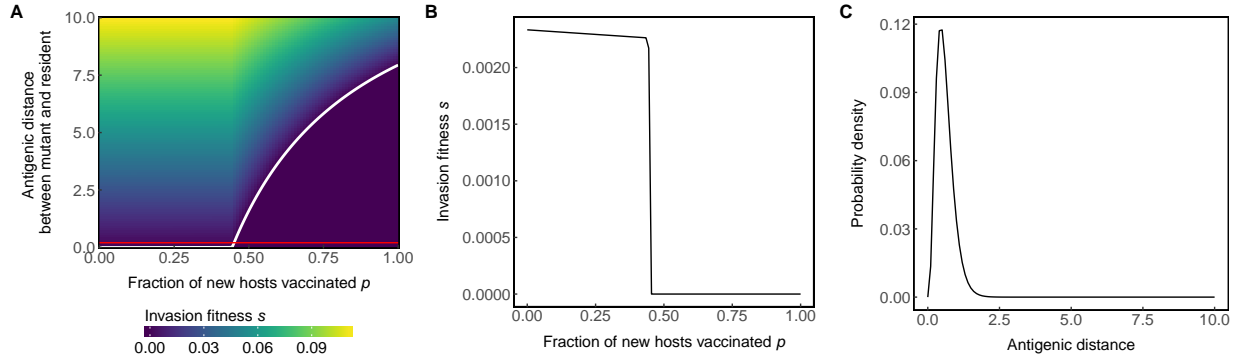

Figure S1: (A) High vaccination rates decrease the invasion fitness of mutant strains. For a given vaccination rate, the invasion fitness of a mutant increases with antigenic distance. However, the invasion fitness of a mutant at a given distance decreases as vaccine coverage increases. An example profile of invasion fitnesses is shown for  $d = 0.2$  (the red line) in (B). Above the invasion threshold for the resident ( $\rho > 1 - 1/R_0$ ), the mutant must be increasingly more distant to invade. The white curve shows the invasion threshold, where the invasion fitness for the mutant strain is zero. Mutants above the curve can invade, while mutants below the curve cannot. (C) Density of gamma distributed mutations with a  $\delta_{\text{mean}} = 0.3$  and  $\delta_{\text{sd}} = 0.6$ .

We decompose  $\frac{\partial \mathbf{E}(s)}{\partial p}$  to understand how vaccines affect susceptibility and resistance to change the invasion fitness of the mutant.

$$\frac{\partial \mathbf{E}(s)}{\partial p} = \left( \frac{\partial \mathbf{E}(s)}{\partial S'} \right) \left( \frac{\partial S'}{\partial R'} \right) \left( \frac{\partial R'}{\partial R_v} \right) \left( \frac{\partial R_v}{\partial p} \right) \quad (\text{S18})$$

$$= (\beta)(-1)\left(1 - \frac{c\mathbf{E}(d)}{b}\right)\left(\frac{\nu R_0}{\beta}\right) \quad (\text{S19})$$

584 Since  $1 - \frac{c\mathbf{E}(d)}{b} \geq 0$  (i.e. one cannot be more than 100% immune to infection), vaccination must  
 585 decrease the expected invasion fitness of the mutant  $\frac{\partial \mathbf{E}(s)}{\partial p} \leq 0$ , slowing evolution. This decrease  
 586 is attributed to vaccination reducing susceptibility to the mutant by increasing immunity ( $\frac{\partial S'}{\partial R'} \leq 0$   
 587 and  $\frac{\partial R'}{\partial p} > 0$ ) against any mutant. Larger breadth of vaccine-induced immunity ( $b$ ) also decreases  
 588 the expected invasion fitness.

589

## 590 1.2 Model validation without antigenic evolution

591 In the main text, we show general agreement between our simulations and observations of in-  
 592 fluenza's epidemiology and evolution using our parameterization. We further validate the epidemi-  
 593 ological processes of our agent-based model by removing evolution and comparing output against  
 594 analytic solutions to a model using deterministic ordinary differential equations. A simple analytic  
 595 solution to a model with antigenic evolution is intractable.

596 Classical *SIR* models include vaccination of newborns only. In a newborn-only vaccination  
 597 model, the threshold eradication rate  $p_t = 1 - 1/R_0 \equiv \frac{\gamma + \nu}{\beta}$ . Here, we derive an eradication  
 598 threshold vaccination rate for a model where all hosts are vaccinated at the same rate.

$$\frac{dS}{dt} = \nu - \nu S - \beta SI - pS \quad (\text{S20})$$

$$\frac{dI}{dt} = \beta SI - \gamma I - \nu I - pI \quad (\text{S21})$$

$$\frac{dR}{dt} = \gamma I - \nu R - pR \quad (\text{S22})$$

$$\frac{dV}{dt} = p - \nu V - pV \quad (\text{S23})$$

599 At equilibrium:

$$\frac{dI}{dt} = 0 = \beta S^* I^* - \gamma I^* - \nu I^* - pI^* \quad (\text{S24})$$

$$S^* = \frac{\gamma + \nu + p}{\beta} \equiv \frac{1}{R_0} \quad (\text{S25})$$

600 We find agreement between the simulated equilibrium fraction susceptible and the theoretical  
601  $S^*$  for a range of influenza-like values of  $R_0$  (1.2-3.0) S2.

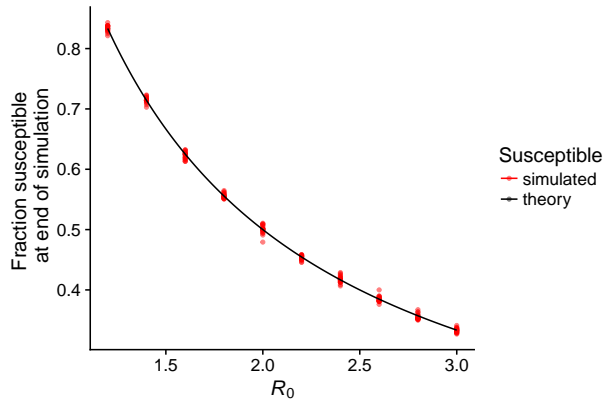

Figure S2: Simulated susceptible fraction at the end of 20 years without vaccination. The theoretical equilibrium fraction susceptible is given by  $S^* = \frac{1}{R_0}$

602 We derive a general expression for the eradication threshold first by calculating  $I^*$ :

$$\frac{dS}{dt} = 0 = \nu - \nu S^* - \beta S^* I^* - pS^* \quad (\text{S26})$$

$$0 = \nu - S^*(\nu + \beta I^* + p) \quad (\text{S27})$$

$$\nu \frac{\beta}{\gamma + \nu + p} = \nu + p + \beta I^* \quad (\text{S28})$$

$$\nu \frac{\beta}{\gamma + \nu + p} - \nu - p = \beta I^* \quad (\text{S29})$$

$$I^* = \frac{\nu}{\beta} (R_v - 1) - \frac{p}{\beta} \quad (\text{S30})$$

603 The condition for the existence of a disease-free equilibrium is  $I^* > 0$ . We derive an eradication  
 604 threshold  $p_t$  for which  $I^* = 0$ :

$$I^* = \frac{\nu}{\beta}(R_v - 1) - \frac{p_t}{\beta} = 0 \quad (\text{S31})$$

$$\frac{\nu}{\beta}(R_v - 1) - \frac{p_t}{\beta} = 0 \quad (\text{S32})$$

$$\nu(R_v - 1) = p_t \quad (\text{S33})$$

$$\frac{\nu\beta}{\nu + \gamma + p} - \nu = p \quad (\text{S34})$$

$$\nu\beta - \nu(\nu + \gamma + p) = p^2 + (\gamma + \nu)p \quad (\text{S35})$$

$$\nu\beta - \nu(\nu + \gamma) = p^2 + (\gamma + 2\nu)p \quad (\text{S36})$$

$$0 = p^2 + (\gamma + 2\nu)p - \nu\beta + \nu(\nu + \gamma) \quad (\text{S37})$$

605 Since  $p \geq 0$ , we take the nonnegative root.

$$p = \frac{-(\gamma + 2\nu)}{2} + \frac{\sqrt{(\gamma + 2\nu)^2 - 4(\nu(\nu + \gamma) - \nu\beta)}}{2} \quad (\text{S38})$$

$$= \frac{-(\gamma + 2\nu)}{2} + \frac{\sqrt{\gamma^2 + 4\nu\gamma + 4\nu^2 - 4\nu^2 - 4\nu\gamma + 4\nu\beta}}{2} \quad (\text{S39})$$

$$= \frac{-(\gamma + 2\nu)}{2} + \frac{\sqrt{\gamma^2 + 4\nu\beta}}{2} \quad (\text{S40})$$

606 Again, we find agreement between the simulated and theoretical eradication threshold vacci-  
 607 nation rates over a range of influenza-like values of  $R_0$  (Figs. S3, S4). Because we initialize the  
 608 simulations at the endemic equilibrium *without* vaccination, some damped oscillation is to be ex-  
 609 pected, which may cause eradication at slightly lower vaccination rates than expected by theory  
 610 (Fig. S5). For instance, at  $R_0 = 1.8$ , theory predicts eradication at  $p = 0.0267 \text{ day}^{-1}$ , while  
 611 simulation achieves extinction in 20/20 simulations within 20 years at  $p = 0.024$  (Fig. S5).

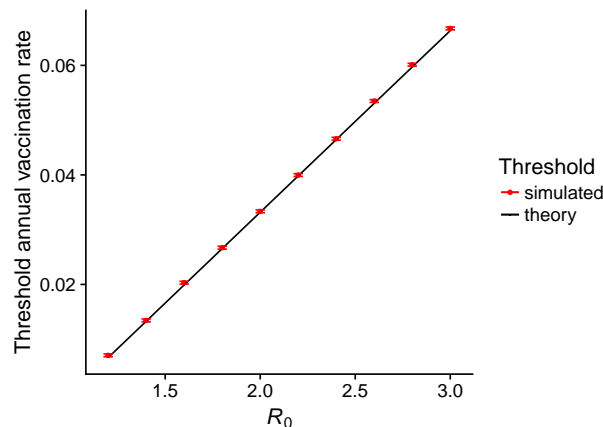

Figure S3: With vaccination, the simulated eradication thresholds agree with analytic predictions. The simulated threshold is the minimum vaccination rate where 40/40 simulations go extinct within 20 years. Error bars show the sampling resolution (Fig. S4). Simulations were initialized at the analytically derived equilibrium S, I, and R with vaccination (equation S40).

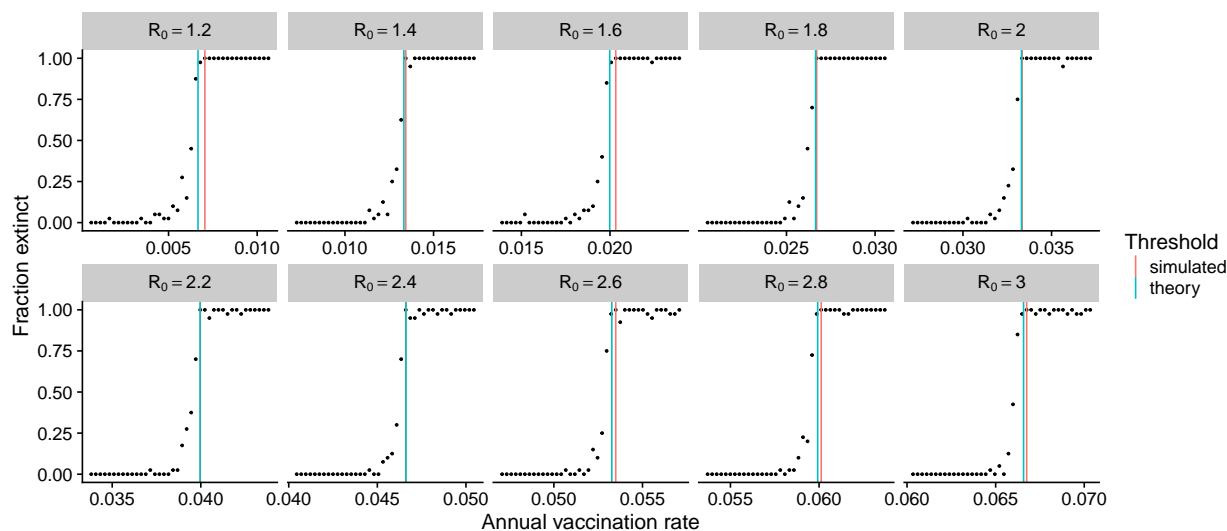

Figure S4: Estimation of simulated eradication thresholds without evolution, starting at the equilibrium  $S$ ,  $I$ , and  $R$  with vaccination. To generate response curves, we ran 40 replicate simulations for each combination of  $R_0$  and vaccination rate and calculated the fraction of extinct simulations. The simulated eradication threshold is the minimum vaccination rate that causes 40/40 simulations to go extinct within 20 years. When the analytic equilibrium  $I$  was nonnegative, we initialized the simulation with a single infection.

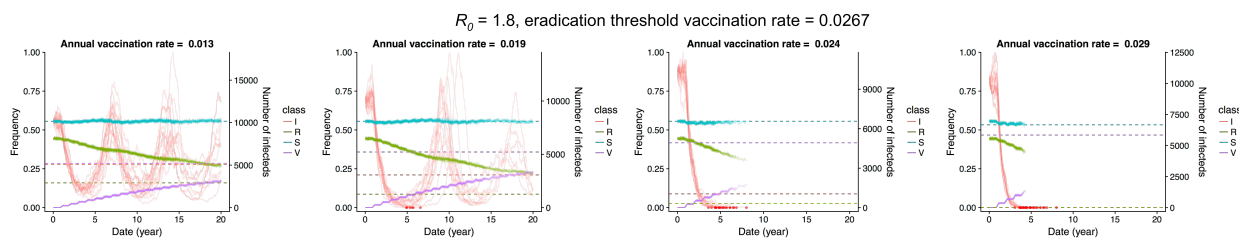

Figure S5: Simulated timeseries without evolution, starting at the endemic equilibrium *without* vaccination (i.e.,  $S_0 = 1/R_0 \equiv \frac{\gamma + \mu + p}{\beta}$ , as in the manuscript, but in contrast to Appendix Figures 2 and 3). Because the population starts away from the vaccinated equilibrium, the system experiences damped oscillations, which increase the probability of stochastic extinction. Thus, we observe extinction even when the vaccination rate is slightly below the expected eradication threshold. Vaccination remains pulsed in 9-month periods, as in the model. Frequencies of susceptible ( $S$ ), infected ( $I$ ), recovered ( $R$ ), and vaccinated ( $V$ ) individuals are shown for 20 replicate simulations. The left y-axis shows the frequencies of  $S$  (blue),  $R$  (green), and  $V$  (purple). The right y-axis shows the number of infections (red). The dashed lines shows the expected equilibrium frequencies for each class.

## 612 2 Supplementary tables and figures

Table S1: Parameters

| Parameter                                                               | Value                              | Reference   |
|-------------------------------------------------------------------------|------------------------------------|-------------|
| Intrinsic reproductive number ( $R_0$ )                                 | 1.8                                | [66, 67]    |
| Duration of infection $1/\gamma$                                        | 5 days                             | [68]        |
| Population size $N$                                                     | 50 million                         | (see text)  |
| Birth/death (turnover) rate $\nu$                                       | $1/30 \text{ year}^{-1}$           | [69]        |
| Mutation rate $\mu$                                                     | $10^{-4} \text{ day}^{-1}$         | (see text)  |
| Mean mutation step size $\delta_{\text{mean}}$                          | 0.6 antigenic units                | (see text)  |
| SD mutation step size $\delta_{\text{sd}}$                              | 0.3 antigenic units                | (see text)  |
| Infection risk conversion $c$                                           | 0.07                               | [1, 41, 43] |
| Duration of simulation                                                  | 20 years                           |             |
| Annual vaccination rate $r$                                             | $0.0\text{-}0.2 \text{ year}^{-1}$ |             |
| Breadth of vaccine-induced immunity $b$                                 | 100%                               |             |
| Temporal lag between vaccine strain selection and distribution $\theta$ | 300 days                           |             |



Table S2: Sample panel data

| Identifier |     |     | Data         |                |                |                |                |           |           |            | Interpretation                                                                                                      |
|------------|-----|-----|--------------|----------------|----------------|----------------|----------------|-----------|-----------|------------|---------------------------------------------------------------------------------------------------------------------|
| $\tau$     | $i$ | $j$ | $I_{ij\tau}$ | $V_{ij\tau-1}$ | $V_{ij\tau-2}$ | $V_{ij\tau-3}$ | $V_{ij\tau-4}$ | $r_{1ij}$ | $r_{5ij}$ | $r_{10ij}$ |                                                                                                                     |
| 1          | 1   | 1   | 1            | 0              | 1              | 0              | 0              | 0         | 1         | 0          | The host was infected this season (1) and only vaccinated 2 seasons ago. The population vaccination rate is 5%      |
| 1          | 2   | 1   | 0            | 1              | 0              | 0              | 1              | 0         | 1         | 0          | Host not infected this season (1). Host vaccinated this season and 4 seasons ago. Population vaccination rate is 5% |
| ...        |     |     |              |                |                |                |                |           |           |            |                                                                                                                     |
| 10         | 1   | 2   | 1            | 0              | 0              | 0              | 1              | 0         | 0         | 1          | Host infected this season (10). Host vaccinated 4 seasons ago. Population vaccination rate is 10%                   |

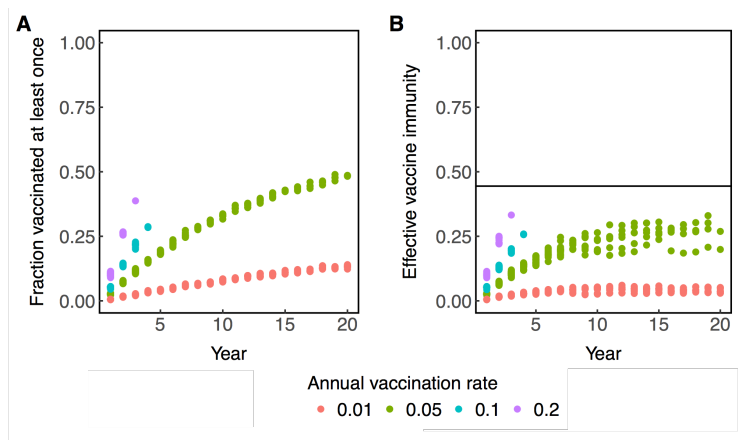

Figure S6: (A) Vaccine coverage and (B) effective vaccine-induced immunity over time calculated from simulations. (A) The fraction of individuals who have been vaccinated at least once accumulated over time and saturates at 50%. (B) The effective amount of vaccine-induced immunity in the population is calculated using the mean antigenic distance between circulating strains and the vaccinated hosts' vaccine strains. At any given time, the effective vaccine immunity is  $\frac{1}{N} \sum_i^{Np} \min \{0, 1 - cd_{xv_i}\}$ , where  $N$  is the host population size,  $p$  is the fraction of vaccinated,  $v_i$  is the vaccine strain received by individual  $i$ ,  $x$  is the average circulating strain,  $d$  is the antigenic distance between the strains, and  $c$  is a constant that converts between antigenic distance and risk. The horizontal line indicates the theoretical eradication threshold in an antigenically homogenous population  $1 - 1/R_0$ .

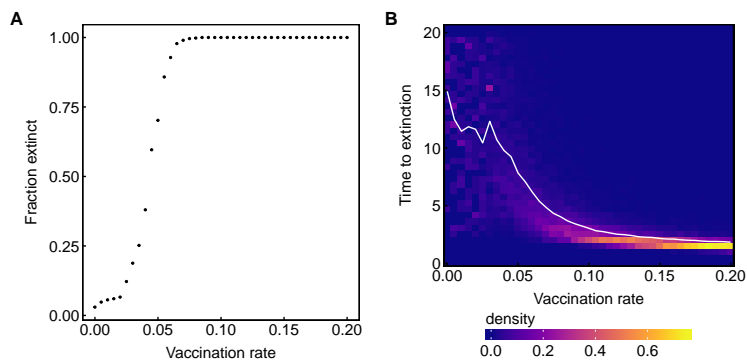

Figure S7: High vaccination rates increase the probability of extinction and shorten the average time to extinction. (A) Points show the fraction of simulations where the viral population went extinct before 20 years. (B) Density of times to extinction. The solid white line shows the average time to extinction across these simulations. Lines reflect 500 total simulations for each vaccination rate with excessively diverse simulations (TMRCA > 10 years) excluded, leaving  $\sim 300 - 400$  simulations.

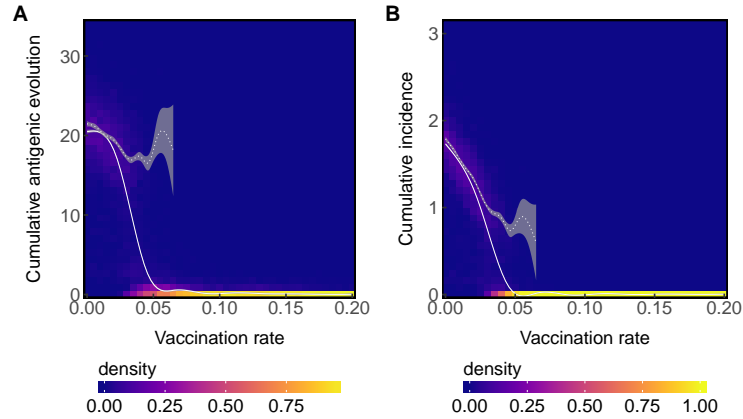

Figure S8: With no temporal lag between vaccine strain selection and distribution, increasing the vaccination rate quickly decreases the average amount of (A) cumulative antigenic evolution (A) and (B) incidence. The solid white line shows a LOESS fit to cumulative antigenic evolution and incidence across all simulations. The dotted white line shows a LOESS fit to cumulative antigenic evolution and incidence for simulations where the viral population did not go extinct. Shaded areas show 95% confidence intervals.

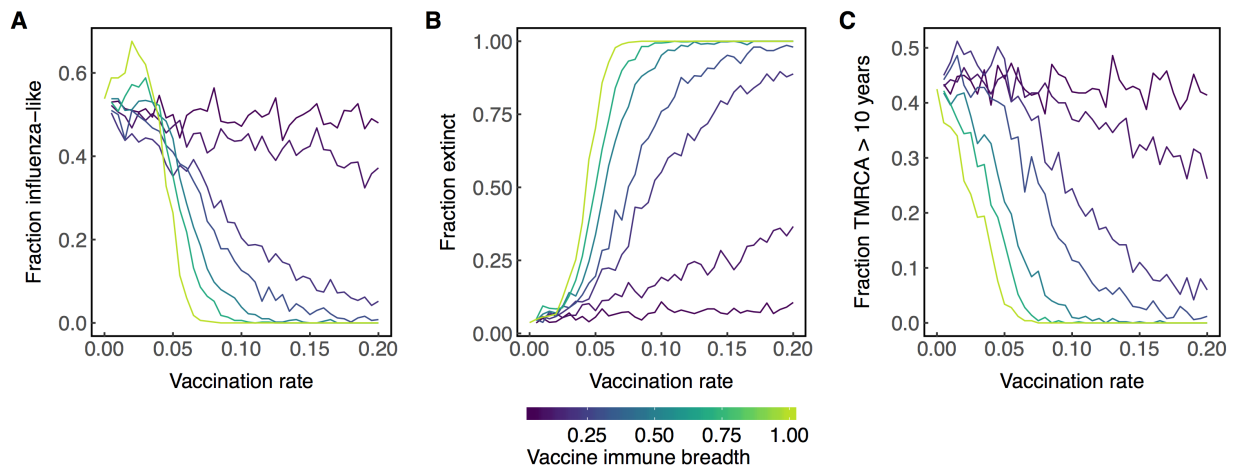

Figure S9: Increasing the vaccination rate increases the probability that the viral population will go extinct (B) and decreases the probability of exhibiting influenza-like dynamics (A) or excessive diversification (TMRCA > 10 years) (C). Lines are colored according to the breadth of the vaccine. Data are collected from 500 replicate simulations per unique combination of vaccination rate and vaccine immune breadth with excessively diverse simulations (TMRCA > 10 years) excluded, leaving ~ 300 – 400 simulations per parameter combination.

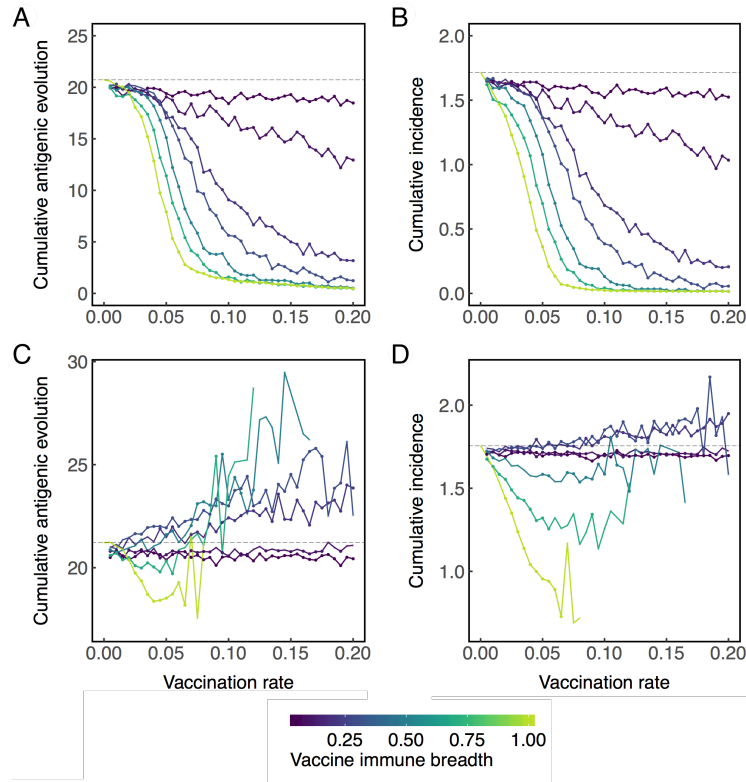

Figure S10: Across all simulations (A&B), vaccination decreases the average (A) cumulative antigenic evolution and (B) incidence regardless of breadth. In the subset of simulations where the viral population does not go extinct (C&D), vaccines with narrow breadth are associated with greater average antigenic evolution (C) and incidence (D), but these increases are not necessarily caused by vaccination (see Fig. S13). Lines are colored according to the breadth of vaccine-induced immunity. The grey dashed lines indicate the average amount of antigenic evolution (A,C) or incidence (B,D) without vaccination. Points indicate significant decrease (below the dashed line) or increase (above the dashed line) compared to no vaccination according to a Wilcoxon rank-sum test ( $p < 0.05$ ) performed on at least 5 replicate simulations. Complete data are shown in Figures S11 and S14. Data are collected from 500 replicate simulations per unique combination of vaccination rate and vaccine immune breadth with excessively diverse simulations (TMRCA > 10 years) excluded, leaving  $\sim 300 - 400$  simulations per parameter combination.

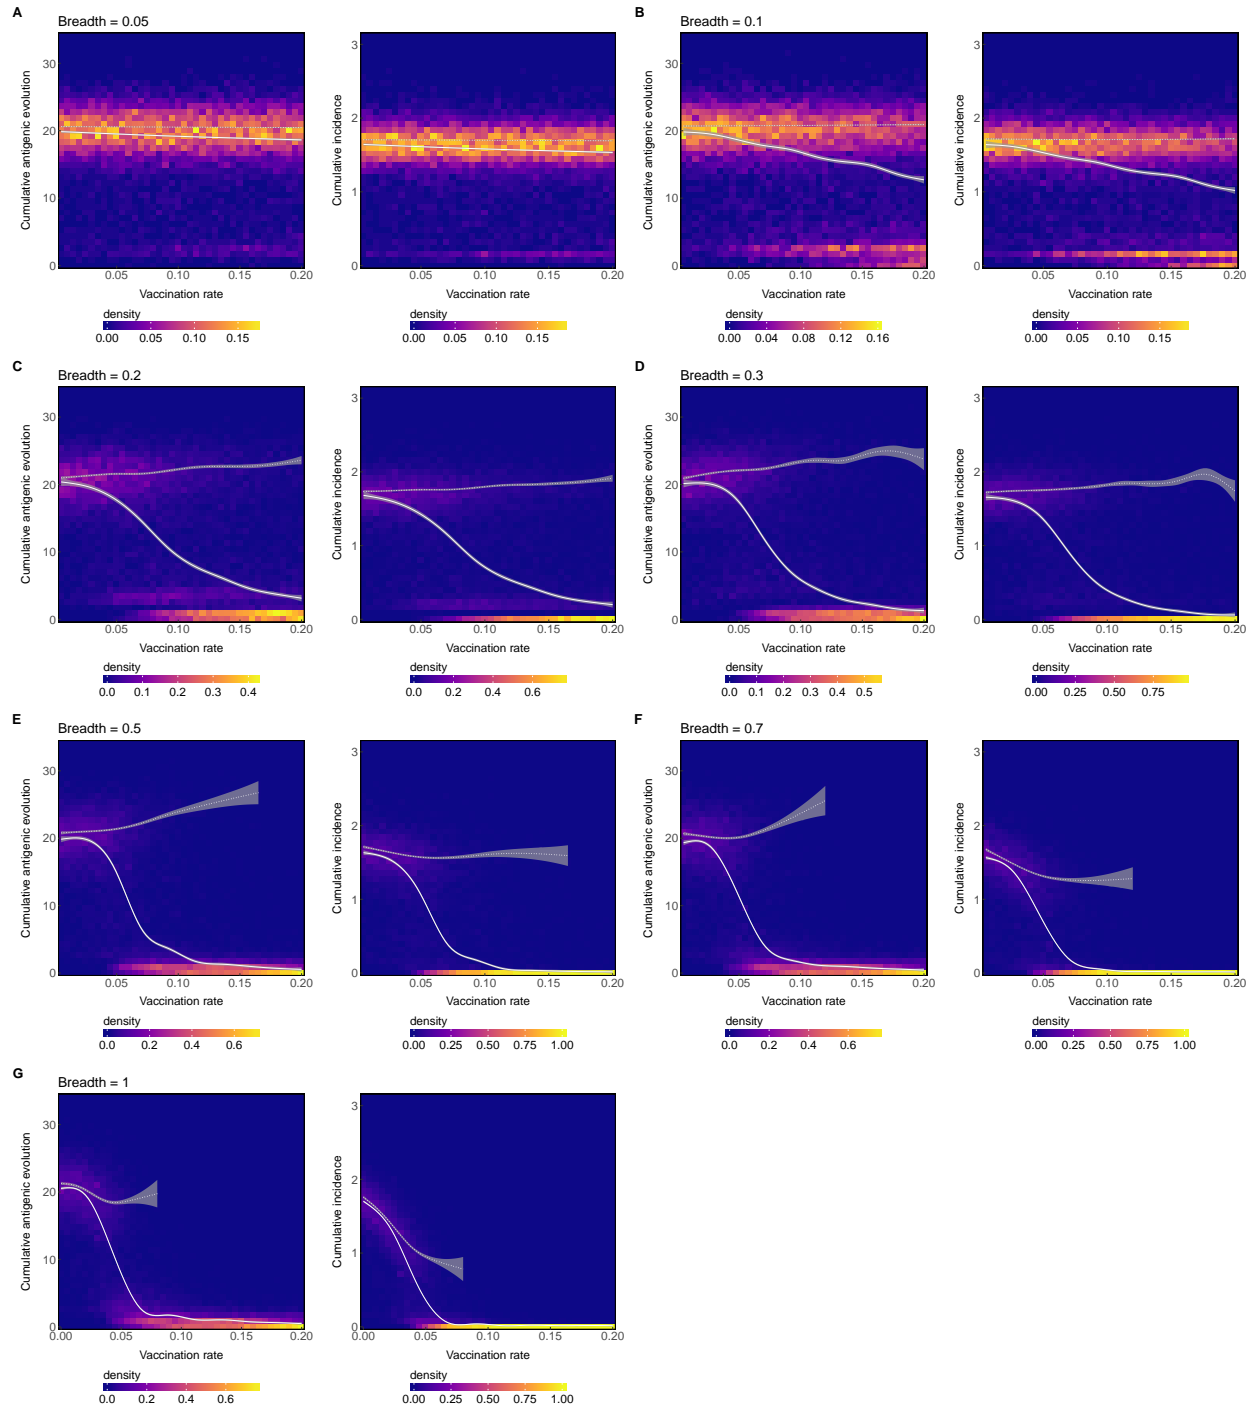

Figure S11: Density plots of complete simulation data corresponding to Figure S10. The solid white lines show a LOESS fit to cumulative antigenic evolution or incidence across all simulations. The dotted white lines show a LOESS fit to cumulative antigenic evolution or incidence for simulations where the viral population did not go extinct. Shaded areas show 95% confidence intervals. Data are collected from 500 replicate simulations per unique combination of vaccination rate and vaccine immune breadth with excessively diverse simulations ( $TMRCA > 10$  years) excluded, leaving  $\sim 300 - 400$  simulations per parameter combination.

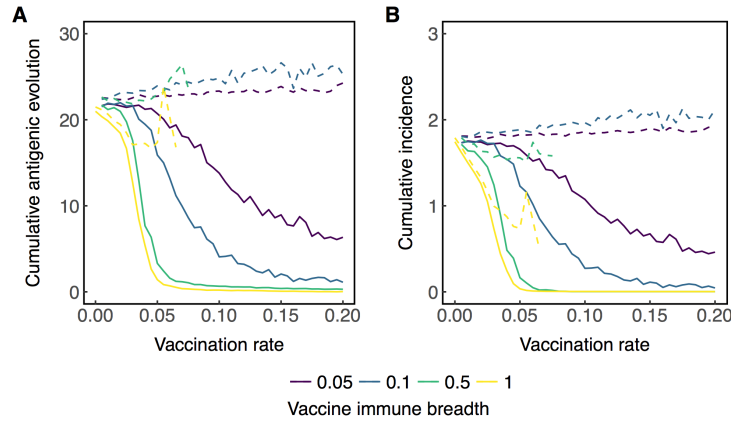

Figure S12: With no temporal lag between vaccine strain selection and distribution, lower vaccination rates are needed to achieve the same reductions in (A) cumulative antigenic evolution and (B) cumulative incidence compared to when vaccines are distributed 300 days after strain selection (Fig. S10). The solid lines show averages across all simulations, while dotted lines show averages over simulations where the viral population did not go extinct. Lines are colored according to the breadth of vaccine-induced immunity. Data are collected from 500 replicate simulations per unique combination of vaccination rate and vaccine immune breadth with excessively diverse simulations (TMRCAs > 10 years) excluded, leaving ~ 300 – 400 simulations per parameter combination.

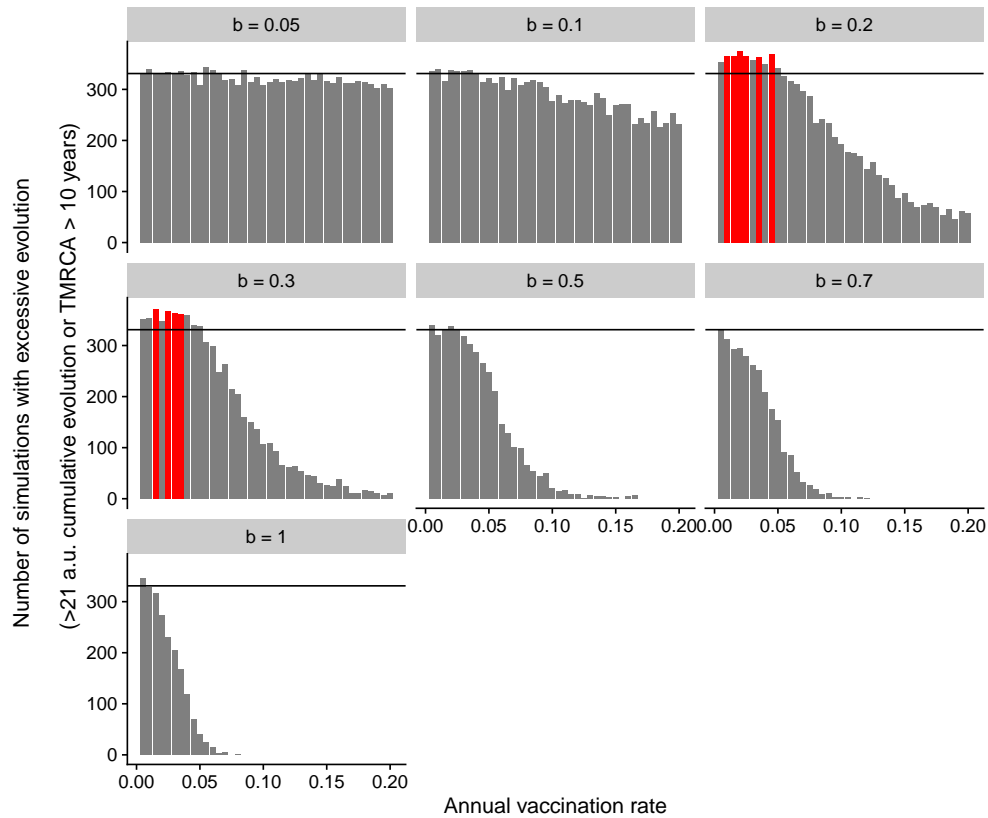

Figure S13: Vaccination almost always reduces the rate of antigenic evolution. The subplots show the number of simulations (out of 1000 replicates for each unique combination of parameters) that demonstrate excessive evolution for each vaccination rate and breadth  $b$ . Here, excessive evolution is defined by either more than 21 antigenic units of cumulative evolution or a TMRCA > 10 years. Black lines show the number of simulations that evolve excessively without vaccination (the null expectation if vaccines do not drive faster evolution). Red bars show significantly more counts of excessive evolution compared to unvaccinated simulations ( $p < 0.05$ , Pearson's  $\chi^2$  test).

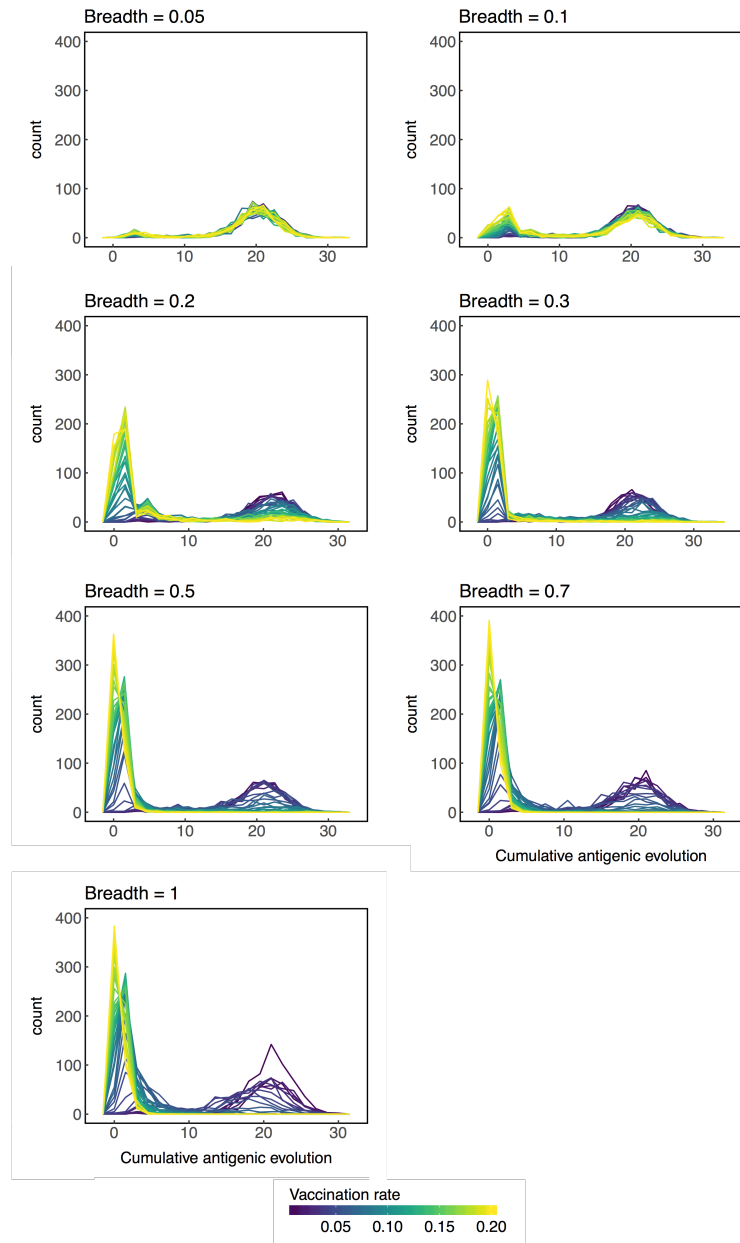

Figure S14: The distributions of cumulative antigenic evolution are profiles along each vaccination rate shown in figure S11. Data are collected from 500 replicate simulations per unique combination of vaccination rate and vaccine immune breadth with excessively diverse simulations (TMRCA > 10 years) excluded, leaving ~ 300 – 400 simulations per parameter combination.



Table S3: Private and social benefits of vaccination. In the static model, vaccination cannot affect antigenic evolution. In the dynamic model, vaccination can affect antigenic evolution. Statistics are computed using a linear panel model on longitudinal panel data of simulated hosts' infection and vaccination histories. Robust standard errors shown in brackets are clustered by simulation.

|                                           | Probability of infection in the current season ( $\tau$ ) |                              |
|-------------------------------------------|-----------------------------------------------------------|------------------------------|
|                                           | Static ( $\times 10^{-2}$ )                               | Dynamic ( $\times 10^{-2}$ ) |
| Constant                                  | 9.91***<br>[0.35]                                         | 9.94***<br>[0.23]            |
| Vaccinated in current season ( $\tau$ )   | -4.65***<br>[0.20]                                        | -3.34***<br>[0.32]           |
| Vaccinated 1 season ago ( $\tau-1$ )      | -3.62***<br>[0.18]                                        | -2.78***<br>[0.33]           |
| Vaccinated 2 seasons ago ( $\tau-2$ )     | -2.65***<br>[0.13]                                        | -2.05***<br>[0.24]           |
| Vaccinated 3 seasons ago ( $\tau-3$ )     | -1.47***<br>[0.19]                                        | -1.74***<br>[0.22]           |
| Vaccinated 3 seasons ago ( $\tau-4$ )     | -1.28***<br>[0.20]                                        | -1.08***<br>[0.16]           |
| Vaccination rate = 1%                     | -0.95**<br>[0.46]                                         | -0.93**<br>[0.47]            |
| Vaccination rate = 5%                     | -2.75***<br>[0.50]                                        | -5.75***<br>[0.65]           |
| Vaccination rate = 10%                    | -2.42***<br>[0.35]                                        |                              |
| Observations                              | 1,627,500                                                 | 987,500                      |
| Number of hosts                           | 140,000                                                   | 87,500                       |
| Vaccine efficacy (%)                      | <b>46.95</b>                                              | <b>33.58</b>                 |
| Vaccine efficacy (% , social $r = 1\%$ )  | <b>9.28</b>                                               | <b>9.36</b>                  |
| Vaccine efficacy (% , social $r = 5\%$ )  | <b>27.4</b>                                               | <b>57.8</b>                  |
| Vaccine efficacy (% , social $r = 10\%$ ) | <b>24.1</b>                                               | —                            |

Table S4: Private and social benefits of vaccination for a vaccine that provides half the immune breadth of natural immunity ( $b = 0.5$ ). In the static model, vaccination cannot affect antigenic evolution. In the dynamic model, vaccination can affect antigenic evolution. Statistics are computed using a linear panel model on longitudinal panel data of simulated hosts' infection and vaccination histories. Robust standard errors shown in brackets are clustered by simulation.

|                                           | Probability of infection in the current season ( $\tau$ ) |                              |
|-------------------------------------------|-----------------------------------------------------------|------------------------------|
|                                           | Static ( $\times 10^{-2}$ )                               | Dynamic ( $\times 10^{-2}$ ) |
| Constant                                  | 9.63***<br>[0.25 ]                                        | 9.84***<br>[0.44]            |
| Vaccinated this season ( $\tau$ )         | -3.48***<br>[0.19 ]                                       | -3.22***<br>[0.22]           |
| Vaccinated 1 seasons ago ( $\tau-1$ )     | -2.00***<br>[0.16 ]                                       | -1.72***<br>[0.22]           |
| Vaccinated 2 seasons ago ( $\tau-2$ )     | -0.88***<br>[0.14 ]                                       | -0.82***<br>[0.19]           |
| Vaccinated 3 seasons ago ( $\tau-3$ )     | -0.08<br>[0.15 ]                                          | 0.26<br>[0.19]               |
| Vaccinated 4 seasons ago ( $\tau-4$ )     | 0.19<br>[0.19 ]                                           | 0.27<br>[0.20]               |
| Vaccination rate = 1%                     | 0.68<br>[0.44 ]                                           | -0.20<br>[0.53]              |
| Vaccination rate = 5%                     | -1.50***<br>[0.41 ]                                       | -0.34<br>[0.50]              |
| Vaccination rate = 10%                    | -0.91<br>[0.88]                                           | -4.85***<br>[1.11]           |
| Observations                              | 1,727,500                                                 | 927,500                      |
| Number of hosts                           | 155,000                                                   | 82,500                       |
| Vaccine efficacy (% , private)            | <b>36.10</b>                                              | <b>32.68</b>                 |
| Vaccine efficacy (% , social $r = 1\%$ )  | <b>-9.24</b>                                              | <b>2.03</b>                  |
| Vaccine efficacy (% , social $r = 5\%$ )  | <b>1.34</b>                                               | <b>3.05</b>                  |
| Vaccine efficacy (% , social $r = 10\%$ ) | <b>7.27</b>                                               | <b>49.3</b>                  |
